# Supplementary material for: Butenolides from the Coral-Derived Fungus Aspergillius terreus SCSIO41404
Source: MDPI journal article supplement (doi:10.3390/md20030212), 2022-03-17
Supplement: s1 [file s1]

# Supporting Information

## Butenolides from the Coral-Derived Fungus *Aspergillus terreus* SCSIO41404

Qingyun Peng<sup>1,2,†</sup>, Weihao Chen<sup>1,3,†</sup>, Xiuping Lin<sup>3</sup>, Jiao Xiao<sup>4</sup>, Yonghong Liu,<sup>1,3,4</sup> and Xuefeng Zhou<sup>1,3,\*</sup>

<sup>1</sup> Southern Marine Science and Engineering Guangdong Laboratory (Guangzhou), Guangzhou 511458, China; pengqingyun18@mails.ucas.ac.cn (Q.P.); chenweihao17@mails.ucas.ac.cn (W.C.); yonghongliu@scsio.ac.cn (Y.L.)

<sup>2</sup> Research Center for Deepsea Bioresources, Sanya, Hainan 572025, China;

<sup>3</sup> CAS Key Laboratory of Tropical Marine Bio-resources and Ecology/Guangdong Key Laboratory of Marine Materia Medica, South China Sea Institute of Oceanology, Chinese Academy of Sciences, Guangzhou 510301, China; xiupinglin@hotmail.com (X.L.)

<sup>4</sup> Wuya College of Innovation, Shenyang Pharmaceutical University, Shenyang 110016, China; xj110121@126.com (J.X.)

\* Correspondence: xfzhou@scsio.ac.cn (X.Z.)

† These authors contributed equally to this work.

### Contents

|                                                                                   |    |
|-----------------------------------------------------------------------------------|----|
| ITS sequence of the strain <i>Aspergillus terreus</i> SCSIO41404.....             | 3  |
| Physicochemical data of 4–13. ....                                                | 3  |
| Table S1. X-ray Crystallographic Data of 1. ....                                  | 7  |
| Table S2. The primer sequences for the genes. ....                                | 8  |
| Figure S1. Experimental ECD spectrum of 3. ....                                   | 8  |
| Figure S2. <sup>1</sup> H NMR spectrum of 1 (CD <sub>3</sub> OD, 700 MHz). ....   | 9  |
| Figure S3. <sup>13</sup> C NMR spectrum of 1 (CD <sub>3</sub> OD, 175 MHz). ....  | 9  |
| Figure S4. DEPT spectrum of 1 (CD <sub>3</sub> OD). ....                          | 10 |
| Figure S5. COSY spectrum of 1 (CD <sub>3</sub> OD). ....                          | 10 |
| Figure S6. HSQC spectrum of 1 (CD <sub>3</sub> OD). ....                          | 11 |
| Figure S7. HMBC spectrum of 1 (CD <sub>3</sub> OD). ....                          | 11 |
| Figure S8. HRESIMS spectrum of 1. ....                                            | 12 |
| Figure S9. UV spectrum of 1. ....                                                 | 12 |
| Figure S10. <sup>1</sup> H NMR spectrum of 2 (CD <sub>3</sub> OD, 700 MHz). ....  | 13 |
| Figure S11. <sup>13</sup> C NMR spectrum of 2 (CD <sub>3</sub> OD, 175 MHz). .... | 13 |
| Figure S12. DEPT spectrum of 2 (CD <sub>3</sub> OD). ....                         | 14 |
| Figure S13. COSY spectrum of 2 (CD <sub>3</sub> OD). ....                         | 14 |

|                                                                                                          |    |
|----------------------------------------------------------------------------------------------------------|----|
| <b>Figure S14.</b> HSQC spectrum of <b>2</b> (CD <sub>3</sub> OD). ....                                  | 15 |
| <b>Figure S15.</b> HMBC spectrum of <b>2</b> (CD <sub>3</sub> OD). ....                                  | 15 |
| <b>Figure S16.</b> HRESIMS spectrum of <b>2</b> . ....                                                   | 16 |
| <b>Figure S17.</b> UV spectrum of <b>2</b> . ....                                                        | 16 |
| <b>Figure S18.</b> <sup>1</sup> H NMR spectrum of <b>3</b> (CD <sub>3</sub> OD, 700 MHz). ....           | 17 |
| <b>Figure S19.</b> <sup>13</sup> C NMR spectrum of <b>3</b> (CD <sub>3</sub> OD, 175 MHz). ....          | 17 |
| <b>Figure S20.</b> DEPT spectrum of <b>3</b> (CD <sub>3</sub> OD). ....                                  | 18 |
| <b>Figure S21.</b> COSY spectrum of <b>3</b> (CD <sub>3</sub> OD). ....                                  | 18 |
| <b>Figure S22.</b> HSQC spectrum of <b>3</b> (CD <sub>3</sub> OD). ....                                  | 19 |
| <b>Figure S23.</b> HMBC spectrum of <b>3</b> (CD <sub>3</sub> OD). ....                                  | 19 |
| <b>Figure S24.</b> HRESIMS spectrum of <b>3</b> . ....                                                   | 20 |
| <b>Figure S25.</b> UV spectrum of <b>3</b> . ....                                                        | 20 |
| <b>Figure S26.</b> <sup>1</sup> H NMR spectrum of <b>4</b> (DMSO- <i>d</i> <sub>6</sub> , 700 MHz). .... | 21 |
| <b>Figure S27.</b> <sup>1</sup> H NMR spectrum of <b>5</b> (CD <sub>3</sub> OD, 700 MHz). ....           | 21 |
| <b>Figure S28.</b> <sup>1</sup> H NMR spectrum of <b>6</b> (CD <sub>3</sub> OD, 700 MHz). ....           | 22 |
| <b>Figure S29.</b> <sup>1</sup> H NMR spectrum of <b>7</b> (CD <sub>3</sub> OD, 700 MHz). ....           | 22 |
| <b>Figure S30.</b> <sup>1</sup> H NMR spectrum of <b>8</b> (CD <sub>3</sub> OD, 700 MHz). ....           | 23 |
| <b>Figure S31.</b> <sup>1</sup> H NMR spectrum of <b>9</b> (CD <sub>3</sub> OD, 700 MHz). ....           | 23 |
| <b>Figure S32.</b> <sup>1</sup> H NMR spectrum of <b>10</b> (CDCl <sub>3</sub> , 700 MHz). ....          | 24 |
| <b>Figure S33.</b> <sup>1</sup> H NMR spectrum of <b>11</b> (CD <sub>3</sub> OD, 700 MHz). ....          | 24 |
| <b>Figure S34.</b> <sup>1</sup> H NMR spectrum of <b>12</b> (CD <sub>3</sub> OD, 700 MHz). ....          | 25 |
| <b>Figure S35.</b> <sup>1</sup> H NMR spectrum of <b>13</b> (CD <sub>3</sub> OD, 700 MHz). ....          | 25 |
| <b>Figure S36.</b> <sup>1</sup> H NMR spectrum of <b>14</b> (CD <sub>3</sub> OD, 700 MHz). ....          | 26 |
| <b>Figure S37.</b> <sup>13</sup> C NMR spectrum of <b>14</b> (CD <sub>3</sub> OD, 175 MHz). ....         | 26 |
| <b>Figure S38.</b> DEPT spectrum of <b>14</b> (CD <sub>3</sub> OD). ....                                 | 27 |
| <b>Figure S39.</b> COSY spectrum of <b>14</b> (CD <sub>3</sub> OD). ....                                 | 27 |
| <b>Figure S40.</b> HSQC spectrum of <b>14</b> (CD <sub>3</sub> OD). ....                                 | 28 |
| <b>Figure S41.</b> HMBC spectrum of <b>14</b> (CD <sub>3</sub> OD). ....                                 | 28 |
| <b>Figure S42.</b> HRESIMS spectrum of <b>14</b> . ....                                                  | 29 |
| <b>Figure S43.</b> UV spectrum of <b>14</b> . ....                                                       | 29 |

**ITS sequence of the strain *Aspergillus terreus* SCSIO41404.**

GGTAAAGCGCTGGTCTTATGGCCACCTCCCACCCGTGACTATTGTACCTTGT  
TGCTTCGGCGGGCCCCGCCAGCGTTTGCTGGCCGCCGGGGGGCGACTCGCC  
CCCGGGCCCGTGCCCGCCGAGACCCCAACATGAACCCTGTTCTGAAAGC  
TTGCAGTCTGAGTGTGATTCTTTGCAATCAGTTAAACTTTCAACAATGGAT  
CTCTTGGTTCCGGCATCGATGAAGAACGCAGCGAAATGCGATAACTAATGT  
GAATTGCAGAATTCAGTGAATCATCGAGTCTTTGAACGCACATTGCGCCCC  
CTGGTATTCCGGGGGGGCATGCCTGTCCGAGCGTCATTGCTGCCCTCAAGCC  
CGGCTTGTGTGTTGGGGCCCTCGTCCCCCGGCTCCCGGGGGACGGGCCCCGA  
AAGGCAGCGGCGGCACCGCGTCCGGTCCTCGAGCGTATGGGGCTTCGTCT  
TCCGCTCCGTAGGCCCGGCCGCGCCCGCCGACGCATTTATTTGCAACTTG  
TTTTTTTTTCCAGGTTGACCTCGGATCAGGTAGGGATACCCGCTGAACTTAA  
GCATATCAATAAGCGGAGGAA

**Physicochemical data of 4–13.**

Butyrolactone II (**4**): yellow oil;  $[\alpha]_D^{20} = +30.5$  (*c* 0.1, MeOH);  $^1\text{H}$  NMR (700 MHz, DMSO-*d*<sub>6</sub>)  $\delta_{\text{H}}$  10.57 (1H, s, 2-OH), 9.95 (1H, s, 4'-OH), 9.22 (1H, s, 4''-OH), 7.49 (2H, d, *J* = 8.7 Hz, H-2', H-6'), 6.85 (2H, d, *J* = 8.7 Hz, H-3', H-5'), 6.56 (2H, d, *J* = 8.5 Hz, H-2'', H-6''), 6.48 (2H, d, *J* = 8.5 Hz, H-3'', H-5''), 3.71 (3H, s, 5-OCH<sub>3</sub>), 3.37 (2H, d, *J* = 9.7 Hz, H-6);  $^{13}\text{C}$  NMR (175 MHz, DMSO-*d*<sub>6</sub>)  $\delta_{\text{C}}$  169.8 (qC, C-5), 167.9 (qC, C-1), 157.9 (qC, C-4'), 156.3 (qC, C-4''), 138.1 (qC, C-2), 131.2 (CH, C-2'', C-6''), 128.8 (CH, C-2', C-6'), 127.5 (qC, C-3), 123.2 (qC, C-1''), 121.0 (qC, C-1'), 115.9 (CH, C-3', C-5'), 114.6 (CH, C-3'', C-5''), 84.7 (qC, C-4), 53.5 (CH<sub>3</sub>, 5-OCH<sub>3</sub>), 38.0 (CH<sub>2</sub>, C-6).

Methyl (*R*)-2-benzyl-4-hydroxy-3-(4-hydroxyphenyl)-5-oxo-2,5-dihydrofuran-2-carboxylate (**5**): yellow oil;  $[\alpha]_D^{25} = +65.6$  (*c* 0.1, MeOH);  $^1\text{H}$  NMR (700 MHz, CD<sub>3</sub>OD)  $\delta_{\text{H}}$  7.58 (2H, d, *J* = 8.8 Hz, H-2', H-6'), 7.13 (1H, t, *J* = 7.3 Hz, H-4''), 7.09 (2H, t, *J* = 7.3 Hz, H-3'', H-5''), 6.87 (2H, d, *J* = 8.8 Hz, H-3', H-5'), 6.83 (2H, d, *J* = 7.3 Hz, H-2'', H-6''), 3.79 (3H, s, 5-OCH<sub>3</sub>), 3.56 (2H, s, H-6);  $^{13}\text{C}$  NMR (175 MHz, CD<sub>3</sub>OD)  $\delta_{\text{C}}$  171.4 (qC, C-5) 170.1 (qC, C-1), 159.4 (qC, C-4'), 139.7 (qC, C-2), 134.7 (qC, C-1''), 131.5 (CH, C-2', C-6'), 130.3 (CH, C-2'', C-6''), 129.0 (qC, C-3), 128.8 (CH, C-3'', C-5''), 128.1 (CH, C-4''), 123.0 (qC, C-1'), 116.6 (CH, C-3', C-5'), 86.5 (qC, C-4), 53.9 (CH<sub>3</sub>, 5-OCH<sub>3</sub>), 40.2 (CH<sub>2</sub>, C-6).

Butyrolactone I (**6**): yellow oil;  $[\alpha]_D^{20} = +64.0$  (*c* 0.2, MeOH);  $^1\text{H}$  NMR (700 MHz, CD<sub>3</sub>OD)  $\delta_{\text{H}}$  7.59 (2H, d, *J* = 8.8 Hz, H-2', H-6'), 6.87 (2H, d, *J* = 8.8 Hz, H-3', H-5'), 6.54 (1H, dd, *J* = 8.2, 2.1 Hz, H-6''), 6.50 (1H, d, *J* = 8.2 Hz, H-5''), 6.41 (1H, d,

$J = 2.1$  Hz, H-2''), 5.06 (1H, m, H-8''), 3.78 (3H, s, 5-OCH<sub>3</sub>), 3.45 (1H, d,  $J = 14.8$  Hz, H<sub>a</sub>-6), 3.41 (1H, d,  $J = 14.8$  Hz, H<sub>b</sub>-6), 3.07 (2H, m, H-7''), 1.67 (3H, br s, H-11''), 1.57 (3H, br s, H-10''); <sup>13</sup>C NMR (175 MHz, CD<sub>3</sub>OD)  $\delta_C$  171.6 (qC, C-5), 170.4 (qC, C-1), 159.3 (qC, C-4'), 155.1 (qC, C-4''), 139.7 (qC, C-2), 133.0 (qC, C-9''), 132.4 (CH, C-2''), 130.4 (CH, C-2', C-6'), 129.8 (CH, C-6''), 129.1 (qC, C-3), 128.4 (qC, C-3''), 125.1 (qC, C-1''), 123.6 (CH, C-8''), 123.2 (qC, C-1'), 116.6 (CH, C-3', C-5'), 115.0 (CH, C-5''), 86.8 (qC, C-4), 53.8 (CH<sub>3</sub>, 5-OCH<sub>3</sub>), 39.6 (CH<sub>2</sub>, C-6), 28.7 (CH<sub>2</sub>, C-7''), 26.0 (CH<sub>3</sub>, C-11), 17.8 (CH<sub>3</sub>, C-10'').

Versicolactone B (**7**): white powder;  $[\alpha]_D^{25} = +67.7$  ( $c$  0.1, MeOH); <sup>1</sup>H NMR (700 MHz, CD<sub>3</sub>OD)  $\delta_H$  7.70 (2H, d,  $J = 7.5$  Hz, H-2', H-6'), 7.46 (2H, t,  $J = 7.5$  Hz, H-3', H-5'), 7.38 (1H, t,  $J = 7.5$  Hz, H-4'), 6.51 (1H, dd,  $J = 8.2, 2.0$  Hz, H-6''), 6.49 (1H, d,  $J = 8.2$  Hz, H-5''), 6.40 (1H, d,  $J = 2.0$  Hz, H-2''), 5.06 (1H, m, H-8''), 3.79 (3H, s, 5-OCH<sub>3</sub>), 3.45 (2H, br s, H-6), 3.07 (2H, m, H-7''), 1.65 (3H, br s, H-11''), 1.57 (3H, br s, H-10''); <sup>13</sup>C NMR (175 MHz, CD<sub>3</sub>OD)  $\delta_C$  171.5 (qC, C-5), 169.9 (qC, C-1), 155.2 (qC, C-4''), 141.9 (qC, C-2), 132.9 (qC, C-9''), 132.4 (CH, C-2''), 131.9 (CH, C-2', C-6'), 129.8 (CH, C-3', C-5', C-6''), 129.7 (qC, C-3), 128.6 (CH, C-4'), 128.5 (qC, C-3''), 128.0 (qC, C-1'), 125.0 (qC, C-1''), 123.6 (CH, C-8''), 115.1 (CH, C-5''), 86.9 (qC, C-4), 53.9 (CH<sub>3</sub>, 5-OCH<sub>3</sub>), 39.5 (CH<sub>2</sub>, C-6), 28.8 (CH<sub>2</sub>, C-7''), 26.0 (CH<sub>3</sub>, C-11), 17.8 (CH<sub>3</sub>, C-10'').

Aspernolide D (**8**): white powder;  $[\alpha]_D^{25} = +61.3$  ( $c$  0.1, MeOH); <sup>1</sup>H NMR (700 MHz, CD<sub>3</sub>OD)  $\delta_H$  7.58 (2H, d,  $J = 8.7$  Hz, H-2', H-6'), 6.87 (2H, d,  $J = 8.7$  Hz, H-3', H-5'), 6.50 (1H, dd,  $J = 8.1, 1.9$  Hz, H-6''), 6.48 (1H, d,  $J = 8.1$  Hz, H-5''), 6.47 (1H, d,  $J = 1.9$  Hz, H-2''), 5.39 (1H, m, H-8''), 3.91 (2H, br s, H-10''), 3.78 (3H, s, 5-OCH<sub>3</sub>), 3.45 (1H, d,  $J = 14.6$  Hz, H<sub>a</sub>-6), 3.41 (1H, d,  $J = 14.6$  Hz, H<sub>b</sub>-6), 3.15 (2H, d,  $J = 7.4$  Hz, H-7''), 1.65 (3H, br s, H-11''); <sup>13</sup>C NMR (175 MHz, CD<sub>3</sub>OD)  $\delta_C$  171.6 (qC, C-5), 170.4 (qC, C-1), 159.4 (qC, C-4'), 155.2 (qC, C-4''), 139.8 (qC, C-2), 136.3 (qC, C-9''), 132.7 (CH, C-2''), 130.4 (CH, C-2', C-6'), 129.9 (CH, C-6''), 129.2 (qC, C-3), 127.9 (qC, C-3''), 125.3 (CH, C-8''), 125.2 (qC, C-1''), 123.2 (qC, C-1'), 116.6 (CH, C-3', C-5'), 115.1 (CH, C-5''), 86.9 (qC, C-4), 69.1 (CH<sub>2</sub>, C-10''), 53.9 (CH<sub>3</sub>, 5-OCH<sub>3</sub>), 39.5 (CH<sub>2</sub>, C-6), 28.6 (CH<sub>2</sub>, C-7''), 13.8 (CH<sub>3</sub>, C-11).

Aspernolide A (**9**): yellow oil;  $[\alpha]_D^{25} = +38.6$  ( $c$  0.1, MeOH); <sup>1</sup>H NMR (700 MHz, CD<sub>3</sub>OD)  $\delta_H$  7.56 (2H, d,  $J = 8.9$  Hz, H-2', H-6'), 6.87 (2H, d,  $J = 8.9$  Hz, H-3', H-5'), 6.51 (1H, dd,  $J = 8.3, 2.1$  Hz, H-6''), 6.48 (1H, d,  $J = 2.1$  Hz, H-2''), 6.43 (1H, d,  $J = 8.3$  Hz, H-5''), 3.79 (3H, s, 5-OCH<sub>3</sub>), 3.44 (2H, s, H-6), 2.58 (2H, m, H-7''), 1.72 (2H,

t,  $J = 6.8$  Hz, H-8''), 1.25(3H, s, H-11''), 1.24 (3H, s, H-10'');  $^{13}\text{C}$  NMR (175 MHz,  $\text{CD}_3\text{OD}$ )  $\delta_{\text{C}}$  171.5 (qC, C-5), 170.3 (qC, C-1), 159.4 (qC, C-4'), 154.3 (qC, C-4''), 139.7 (qC, C-2), 132.6 (CH C-2''), 130.4 (CH, C-2', C-6'), 130.2 (CH, C-6''), 129.3 (qC, C-3), 125.5 (qC, C-3''), 123.1 (qC, C-1''), 121.4 (qC, C-1'), 117.4 (CH, C-5''), 116.6 (CH, C-3', C-5'), 86.8 (qC, C-4), 75.1 (qC, C-9''), 53.9 ( $\text{CH}_3$ , 5- $\text{OCH}_3$ ), 39.6 ( $\text{CH}_2$ , C-6), 33.7 ( $\text{CH}_2$ , C-8''), 27.0 ( $\text{CH}_3$ , C-10''), 26.9 ( $\text{CH}_3$ , C-11''), 23.2 ( $\text{CH}_2$ , C-7'').

Butyrolactone V (**10**): yellow oil;  $[\alpha]_{\text{D}}^{20} = +70.0$  ( $c$  0.1, MeOH);  $^1\text{H}$  NMR (700 MHz,  $\text{CDCl}_3$ )  $\delta_{\text{H}}$  7.59 (2H, d,  $J = 8.6$  Hz, H-2', H-6'), 6.90 (2H, d,  $J = 8.6$  Hz, H-3', H-5'), 6.59 (1H, br s, H-2''), 6.54 (2H, overlapped, H-5'', H-6''), 3.78 (3H, s, 5- $\text{OCH}_3$ ), 3.76 (1H, t,  $J = 4.9$  Hz, H-8''), 3.54 (1H, d,  $J = 14.8$  Hz,  $\text{H}_a$ -6), 3.45 (1H, d,  $J = 14.8$  Hz,  $\text{H}_b$ -6), 2.87 (1H, dd,  $J = 16.8, 4.9$  Hz,  $\text{H}_a$ -7''), 2.62 (1H, dd,  $J = 16.8, 4.9$  Hz,  $\text{H}_b$ -7''), 1.31(3H, s, H-10''), 1.24 (3H, s, H-11'');  $^{13}\text{C}$  NMR (175 MHz,  $\text{CDCl}_3$ )  $\delta_{\text{C}}$  169.9 (qC, C-5), 169.4 (qC, C-1), 156.7 (qC, C-4'), 152.1 (qC, C-4''), 137.5 (qC, C-2), 132.2 (CH C-2''), 129.8 (CH, C-6''), 129.7 (CH, C-2', C-6'), 128.3 (qC, C-3), 124.9 (qC, C-1''), 122.4 (qC, C-1'), 118.3 (qC, C-3''), 116.9 (CH, C-5''), 116.2 (CH, C-3', C-5'), 86.1 (qC, C-4), 76.9 (qC, C-9''), 69.8 (CH, C-8''), 53.7 ( $\text{CH}_3$ , 5- $\text{OCH}_3$ ), 38.8 ( $\text{CH}_2$ , C-6), 31.2 ( $\text{CH}_2$ , C-7''), 24.8 ( $\text{CH}_3$ , C-10''), 22.5 ( $\text{CH}_3$ , C-11'').

Terrelactone (**11**): yellow oil;  $[\alpha]_{\text{D}}^{25} = +54.1$  ( $c$  0.1, MeOH); ESIMS  $m/z$  465.5 [ $\text{M} + \text{Na}]^+$ ;  $^1\text{H}$  NMR (700 MHz,  $\text{CD}_3\text{OD}$ )  $\delta_{\text{H}}$  7.58 (2H, d,  $J = 8.8$  Hz, H-2', H-6'), 6.87 (2H, d,  $J = 8.8$  Hz, H-3', H-5'), 6.50 (1H, dd,  $J = 8.1, 2.1$  Hz, H-6''), 6.48 (1H, d,  $J = 8.1$  Hz, H-5''), 6.45 (1H, d,  $J = 2.1$  Hz, H-2''), 3.79 (3H, s, 5- $\text{OCH}_3$ ), 3.45 (1H, d,  $J = 14.7$  Hz,  $\text{H}_a$ -6), 3.41 (1H, d,  $J = 14.7$  Hz,  $\text{H}_b$ -6), 2.49 (1H, m,  $\text{H}_a$ -7''), 2.40 (1H, m,  $\text{H}_b$ -7''), 1.53 (2H, m, H-8''), 1.20 (3H, s, H-10''), 1.19 (3H, s, H-11'');  $^{13}\text{C}$  NMR (175 MHz,  $\text{CD}_3\text{OD}$ )  $\delta_{\text{C}}$  171.6 (qC, C-5), 170.4 (qC, C-1), 159.4 (qC, C-4'), 155.2 (qC, C-4''), 139.7 (qC, C-2), 132.9 (CH, C-2''), 130.4 (CH, C-2', C-6'), 129.7 (CH, C-6''), 129.6 (qC, C-3), 129.2 (qC, C-3''), 125.2 (qC, C-1''), 123.2 (qC, C-1'), 116.6 (CH, C-3', C-5'), 115.2 (CH, C-5''), 86.9 (qC, C-4), 71.5 (qC, C-9''), 53.9 ( $\text{CH}_3$ , 5- $\text{OCH}_3$ ), 44.7 ( $\text{CH}_2$ , C-8''), 39.5 ( $\text{CH}_2$ , C-6), 29.3 ( $\text{CH}_3$ , C-11''), 29.0 ( $\text{CH}_3$ , C-10''), 25.8 ( $\text{CH}_2$ , C-7'').

Butyrolactone VI (**12**): white solid;  $[\alpha]_{\text{D}}^{25} = +38.2$  ( $c$  0.1, MeOH);  $^1\text{H}$  NMR (700 MHz,  $\text{CD}_3\text{OD}$ ):  $\delta_{\text{H}}$  7.58 (2H, d,  $J = 8.9$  Hz, H-2', H-6'), 6.87 (2H, d,  $J = 8.9$  Hz, H-3', H-5'), 6.61 (1H, d,  $J = 2.0$  Hz, H-2''), 6.52 (1H, d,  $J = 8.2$  Hz, H-5''), 6.49 (1H, dd,  $J = 8.2, 2.0$  Hz, H-6''), 3.79 (3H, s, 5- $\text{OCH}_3$ ), 3.45 (2H, s, H-6), 3.44 (1H, m, H-8''), 2.68

(1H, dd,  $J = 14.1, 2.2$  Hz, H<sub>a</sub>-7''), 2.54 (1H, dd,  $J = 14.1, 10.0$  Hz, H<sub>b</sub>-7''), 1.18 (3H, s, H-10''), 1.17 (3H, s, H-11''); <sup>13</sup>C NMR (175 MHz, CD<sub>3</sub>OD)  $\delta_C$  171.6 (qC, C-5), 170.4 (qC, C-1), 159.4 (qC, C-4'), 155.9 (qC, C-4''), 139.8 (qC, C-2), 134.3 (CH, C-2''), 130.5 (CH C-6''), 130.4 (CH, C-2', C-6'), 129.3 (qC, C-3), 127.3 (qC, C-3''), 125.5 (qC, C-1''), 123.1 (qC, C-1'), 116.6 (CH, C-3', C-5'), 115.9 (CH, C-5''), 86.8 (qC, C-4), 80.6 (CH, C-8''), 73.8 (qC, C-9''), 53.9 (CH<sub>3</sub>, 5-OCH<sub>3</sub>), 39.5 (CH<sub>2</sub>, C-6), 34.0 (CH<sub>2</sub>, C-7''), 25.5 (CH<sub>3</sub>, C-10''), 25.1 (CH<sub>3</sub>, C-11'').

Butyrolactone IV (**13**): yellow oil;  $[\alpha]_D^{20} = +40.0$  ( $c$  0.1, MeOH); <sup>1</sup>H NMR (700 MHz, CD<sub>3</sub>OD)  $\delta_H$  7.58 (2H, d,  $J = 8.9$  Hz, H-2', H-6'), 6.87 (2H, d,  $J = 8.9$  Hz, H-3', H-5'), 6.61 (1H, br s, H-2''), 6.54 (1H, dd,  $J = 8.2, 1.6$  Hz, H-6''), 6.46 (1H, d,  $J = 8.2$  Hz, H-5''), 4.50 (1H, dd,  $J = 9.4, 8.5$  Hz, H-8''), 3.79 (3H, s, 5-OCH<sub>3</sub>), 3.47 (2H, s, H-6), 3.03 (1H, dd,  $J = 15.8, 8.5$  Hz, H<sub>a</sub>-7''), 2.97 (1H, dd,  $J = 15.8, 9.4$  Hz, H<sub>b</sub>-7''), 1.19 (3H, s, H-10''), 1.16 (3H, s, H-11''); <sup>13</sup>C NMR (175 MHz, CD<sub>3</sub>OD)  $\delta_C$  171.5 (qC, C-5), 170.2 (qC, C-1), 160.5 (qC, C-4''), 159.4 (qC, C-4'), 139.7 (qC, C-2), 131.0 (CH, C-6''), 130.4 (CH, C-2', C-6'), 129.1 (qC, C-3), 128.1 (qC, C-3''), 127.9 (CH C-2''), 126.2 (qC, C-1''), 123.1 (qC, C-1'), 116.6 (CH, C-3', C-5'), 109.1 (CH, C-5''), 90.4 (CH, C-8''), 86.8 (qC, C-4), 72.5 (qC, C-9''), 53.9 (CH<sub>3</sub>, 5-OCH<sub>3</sub>), 39.7 (CH<sub>2</sub>, C-6), 31.3 (CH<sub>2</sub>, C-7''), 25.3 (CH<sub>3</sub>, C-10''), 25.2 (CH<sub>3</sub>, C-11'').

**Table S1.** X-ray crystallographic data for **1**

|                                             |                                                          |
|---------------------------------------------|----------------------------------------------------------|
| Empirical formula                           | C <sub>16</sub> H <sub>12</sub> O <sub>4</sub>           |
| Formula weight                              | 269.08                                                   |
| Temperature/K                               | 293(2)                                                   |
| Crystal system                              | monoclinic                                               |
| Space group                                 | P2/c                                                     |
| a/Å                                         | 23.6601(13)                                              |
| b/Å                                         | 5.4446(3)                                                |
| c/Å                                         | 21.0558(17)                                              |
| $\alpha$ /°                                 | 90                                                       |
| $\beta$ /°                                  | 99.555(7)                                                |
| $\gamma$ /°                                 | 90                                                       |
| Volume/Å <sup>3</sup>                       | 2674.8(3)                                                |
| Z                                           | 4                                                        |
| $\rho_{\text{calc}}/\text{cm}^3$            | 1.412                                                    |
| $\mu/\text{mm}^{-1}$                        | 0.856                                                    |
| F(000)                                      | 1192.0                                                   |
| Crystal size/mm <sup>3</sup>                | 0.4 × 0.1 × 0.05                                         |
| Radiation                                   | CuK $\alpha$ ( $\lambda$ = 1.54184)                      |
| 2 $\Theta$ range for data collection/°      | 8.518 to 148.942                                         |
| Index ranges                                | -29 ≤ h ≤ 28, -6 ≤ k ≤ 6, -7 ≤ l ≤ 26                    |
| Reflections collected                       | 5257                                                     |
| Independent reflections                     | 5257 [R <sub>int</sub> = ?, R <sub>sigma</sub> = 0.0622] |
| Data/restraints/parameters                  | 5257/0/389                                               |
| Goodness-of-fit on F <sup>2</sup>           | 1.061                                                    |
| Final R indexes [I ≥ 2 $\sigma$ (I)]        | R <sub>1</sub> = 0.1083, wR <sub>2</sub> = 0.2959        |
| Final R indexes [all data]                  | R <sub>1</sub> = 0.1280, wR <sub>2</sub> = 0.3097        |
| Largest diff. peak/hole / e Å <sup>-3</sup> | 0.62/-0.48                                               |

**Table S2.** The primer sequences for the genes.

| Gene         | Forward(5'-3' sequence) | Reverse (5'-3' sequence) |
|--------------|-------------------------|--------------------------|
| GAPDH        | GCTCTCTGCTCCTCCTGTTC    | ACGACCAAATCCGTTGACTC     |
| LXR $\alpha$ | TCAGCATCTTCTCTGCAGACCGG | TCATTAGCATCCGTGGGAACA    |
| ABCA1        | ACCCACCTTATGAACAACATGA  | GAGTCGGGTAAACGGAAACAGG   |
| UGT1A1       | CATGCTGGGAAGATACTGTTGAT | GCCCGAGACTAACAAAAGACTCT  |
| TNF $\alpha$ | CAAGCCTGTAGCCCATGTTGTA  | ACCAGCTGGTTATCTCTCAGCT   |
| CXCL10       | GTGGCATTCAAGGAGTACCTC   | TGATGGCCTTCGATTCTGGATT   |
| CYP3A5       | AATGTTTTGTCCTATCGTCAGGG | AGACCTTCGATTTGTGAAGACAG  |
| CYP3A7       | AAACTTGGCCGTGGAAACCT    | CAGCATAGGCTGTTGACAGTC    |
| ALDH3A1      | CTCTGTGACCCCTCGATCCA    | GCATCTTCCCCGTAGAACTCTT   |
| UGT2B10      | GAAATGGACTACAGTTCTGCTGA | GTGGATGAGTCGTTGGGATCA    |
| CYP1A1       | TCGGCCACGGAGTTTCTTC     | GGTCAGCATGTGCCCAATCA     |
| GSTA2        | TACTCCAATATACGGGGCAGAA  | TCCTCAGGTTGACTAAAGGGC    |
| gapdh        | CTTTGGCATTGTGGAAGGGC    | TGCAGGGATGATGTTCTGGG     |
| Il6          | TAGTCCTTCCTACCCCAATTTCC | TTGGTCCTTAGCCACTCCTTC    |
| Cxcl10       | CTCATCCTGCTGGGTCTGAG    | CCTATGGCCCTCATTCTCAC     |
| Bcl2         | GCTACCGTCGTGACTTCGC     | CCCCACCGAACTCAAAGAAGG    |
| Bax          | AGACAGGGGCCTTTTTGCTAC   | AATTCGCCGGAGACACTCG      |
| Pcna         | TTGCACGTATATGCCGAGACC   | GGTGAACAGGCTCATTCTCTCT   |
| Tnf $\alpha$ | GACGTGGAAGTGGCAGAAGAG   | TTGGTGGTTTGTGAGTGTGAG    |
| Ccl2         | CCTGCTGTTACAGTTGCC      | ATTGGGATCATCTTGCTGGT     |
| Lxra         | AGGAGTGTCGACTTCGCAAA    | CTCTTCTTGCCGCTTCAGTTT    |

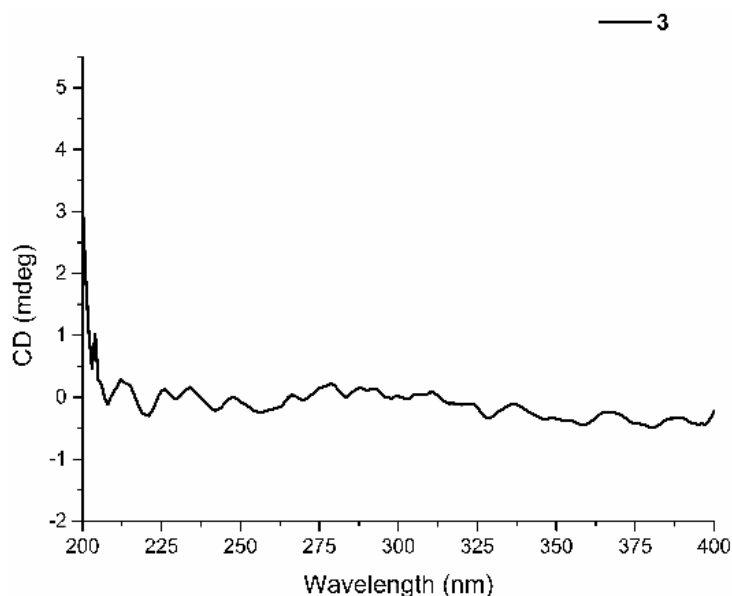**Figure S1.** Experimental ECD spectrum of **3**.



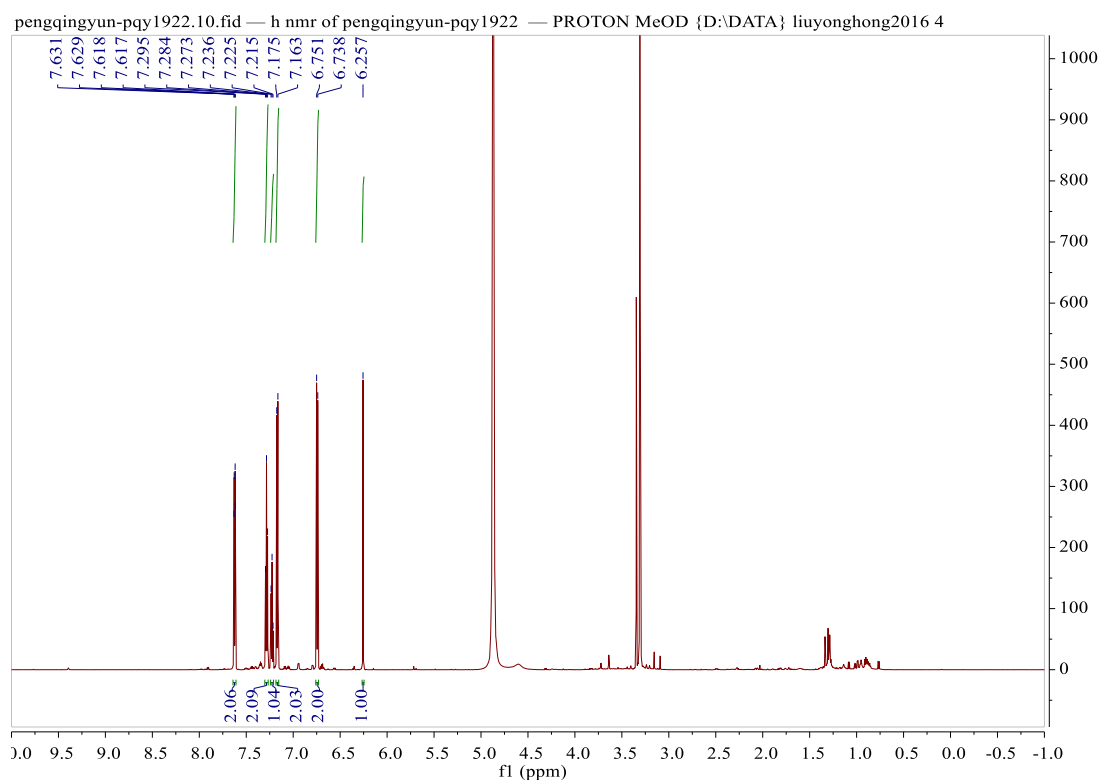

**Figure S2.**  $^1\text{H}$  NMR spectrum of **1** ( $\text{CD}_3\text{OD}$ , 700 MHz)

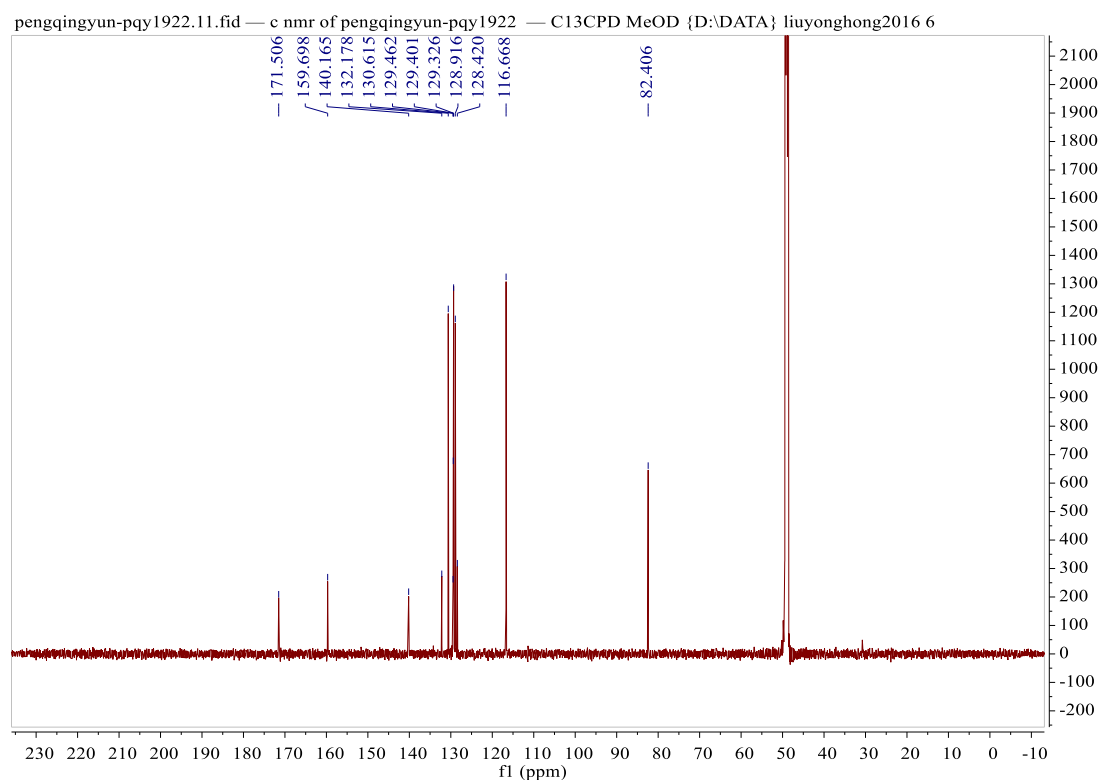

**Figure S3.**  $^{13}\text{C}$  NMR spectrum of **1** ( $\text{CD}_3\text{OD}$ , 175 MHz).

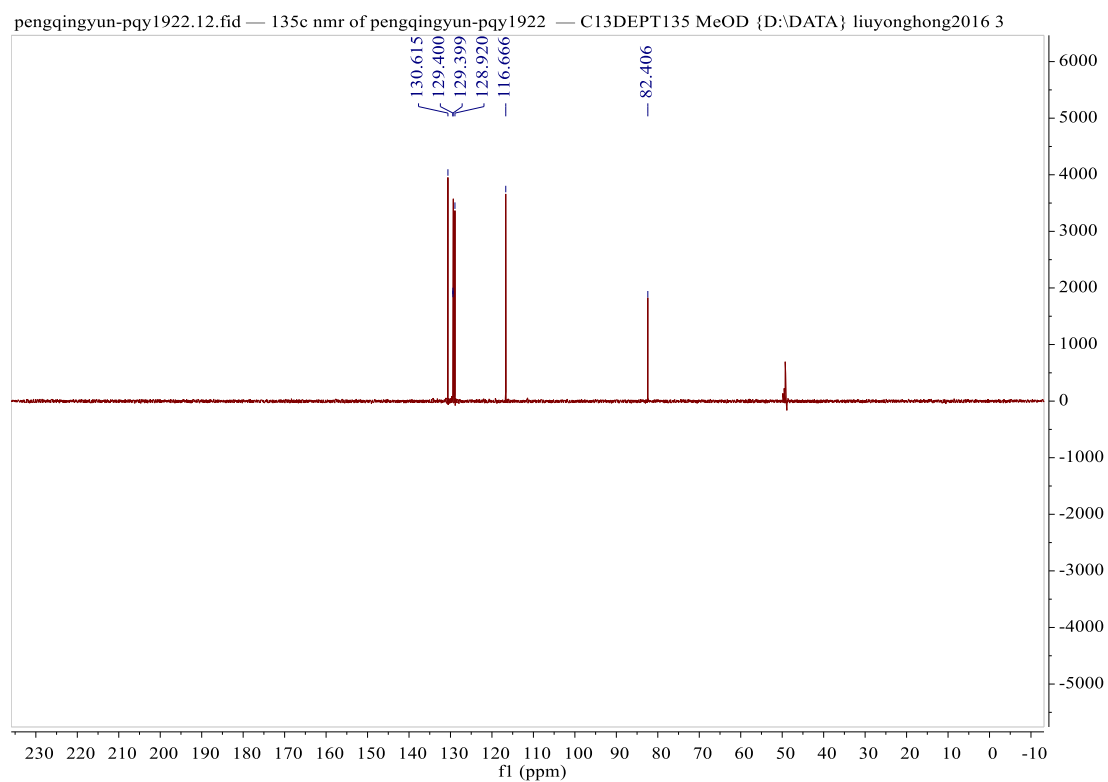

**Figure S4.** DEPT spectrum of **1** (CD<sub>3</sub>OD).

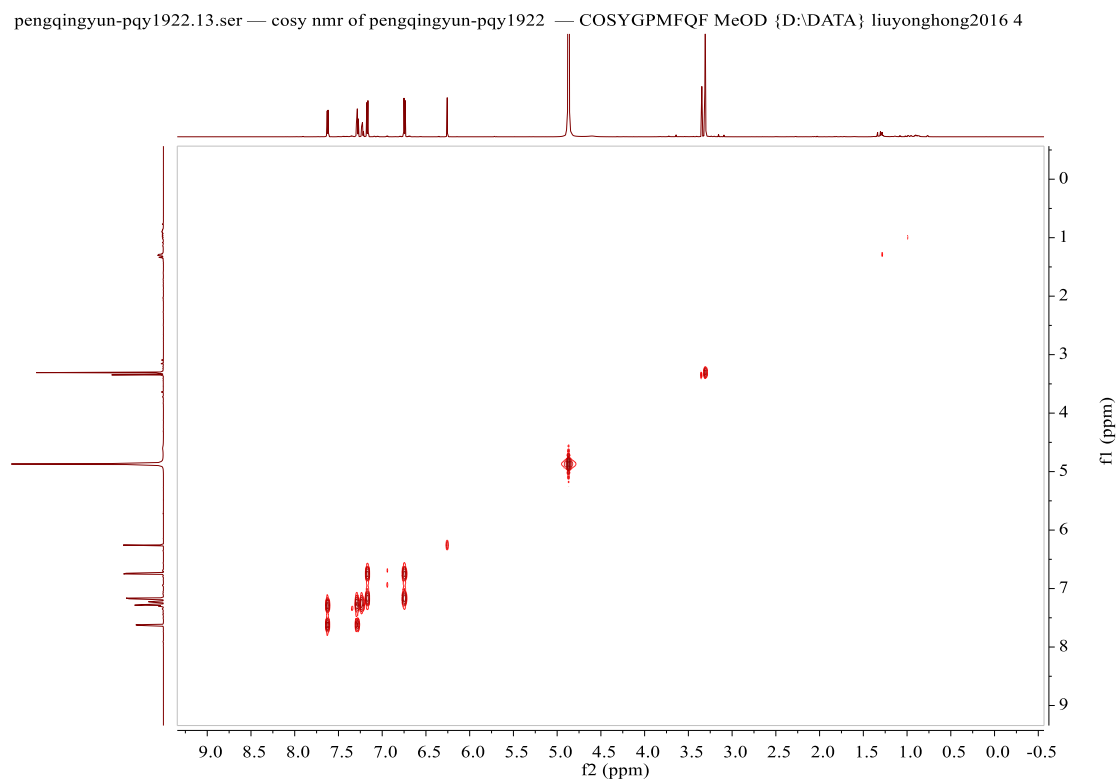

**Figure S5.** COSY spectrum of **1** (CD<sub>3</sub>OD).

pengqingyun-pqy1922.15.ser — qc nmr of pengqingyun-pqy1922 — HSQCEDETGP MeOD {D:\DATA} liuyonghong2016 4

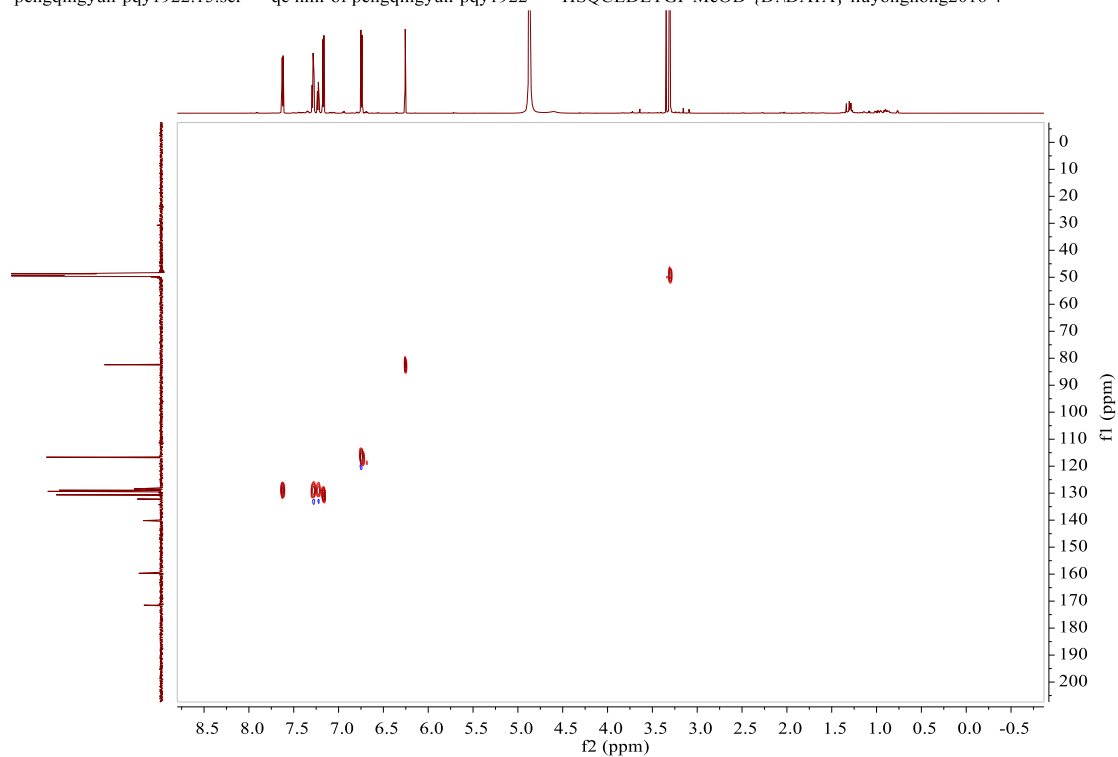

**Figure S6.** HSQC spectrum of **1** (CD<sub>3</sub>OD).

pengqingyun-pqy1922.16.ser — bc nmr of pengqingyun-pqy1922 — hmbcetgpl3nd MeOD {D:\DATA} liuyonghong2016 4

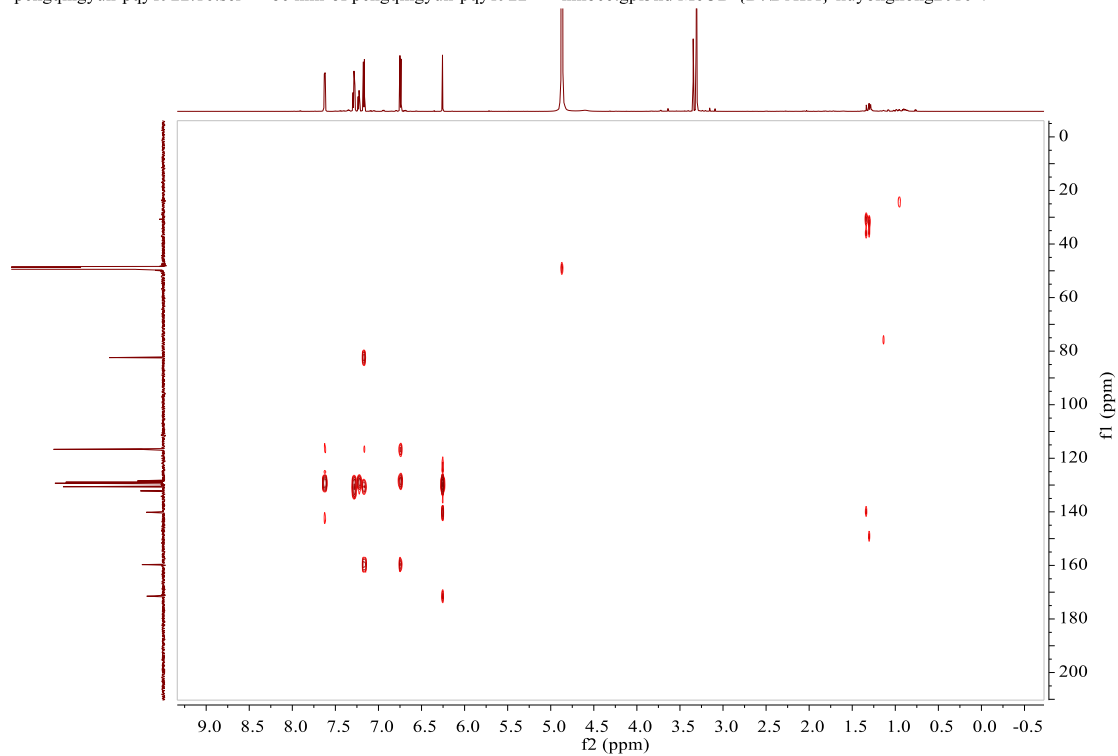

**Figure S7.** HMBC spectrum of **1** (CD<sub>3</sub>OD).

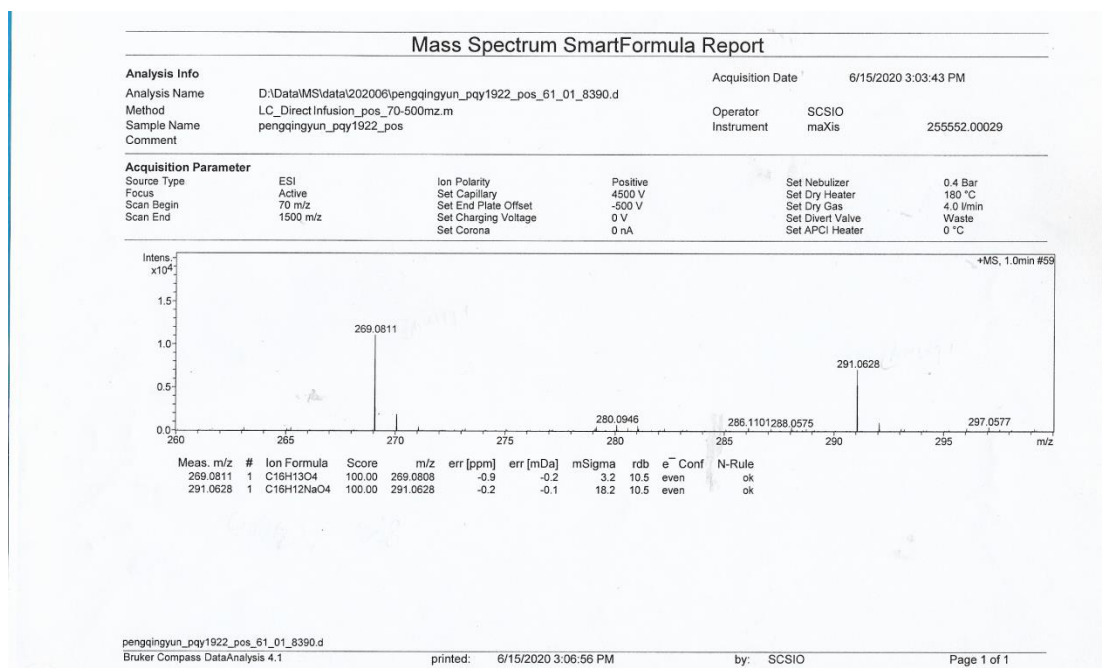

**Figure S8.** HRESIMS spectrum of **1**.

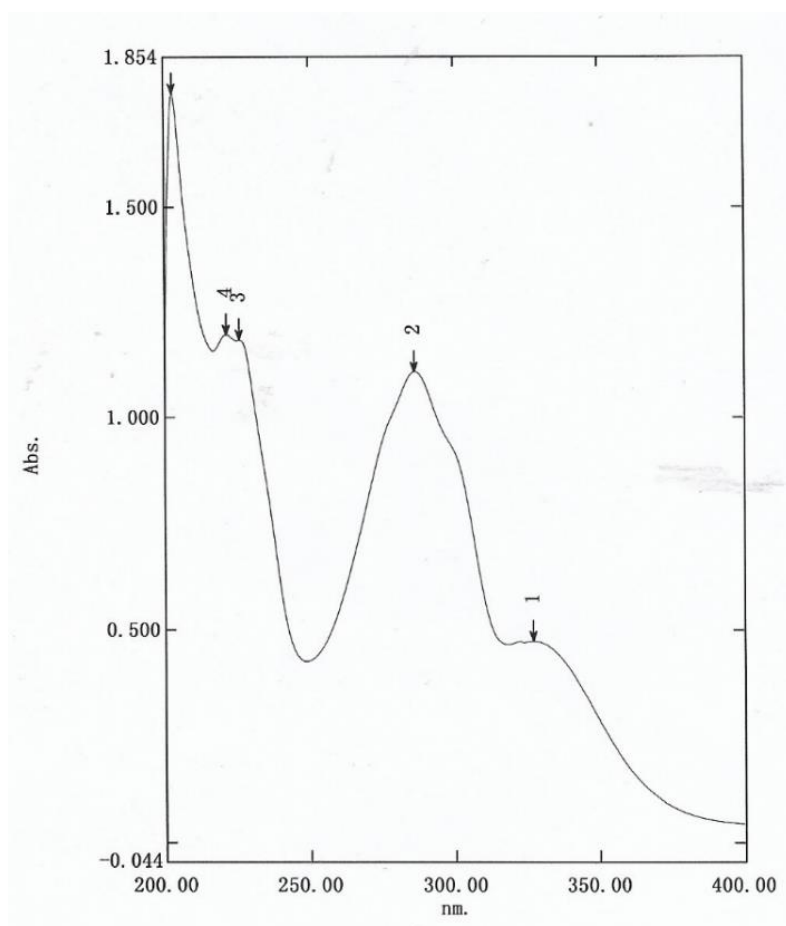

**Figure S9.** UV spectrum of **1**.

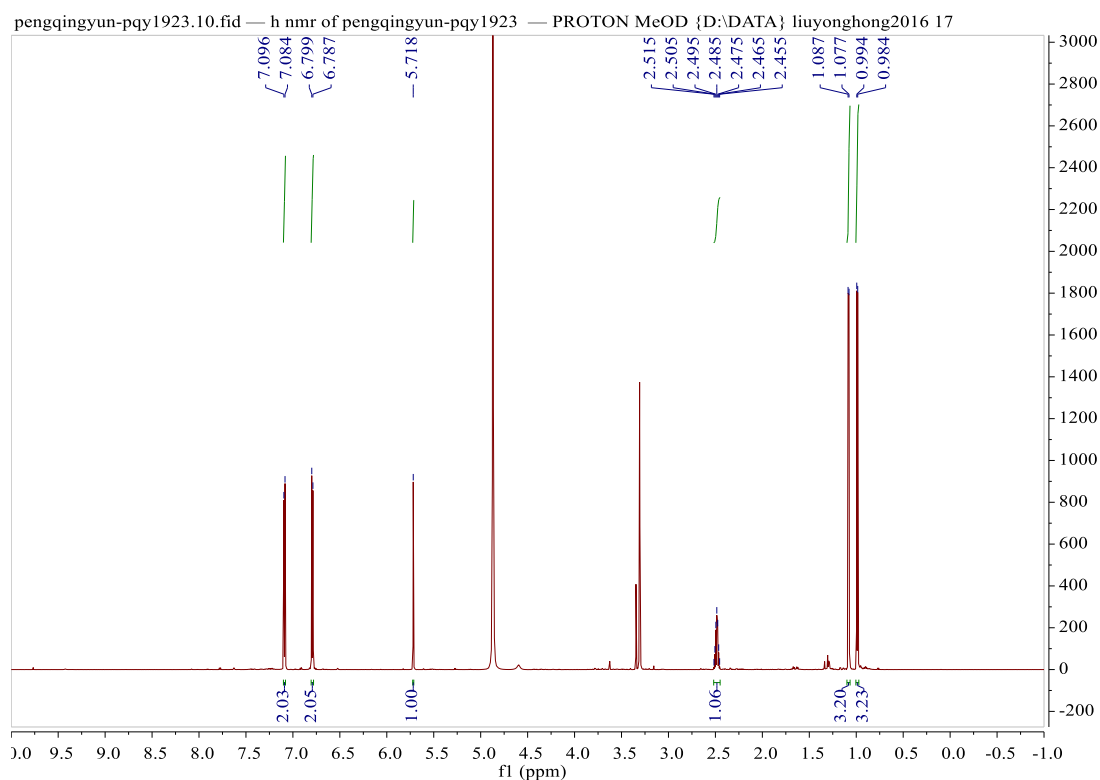

**Figure S10.**  $^1\text{H}$  NMR spectrum of **2** ( $\text{CD}_3\text{OD}$ , 700 MHz).

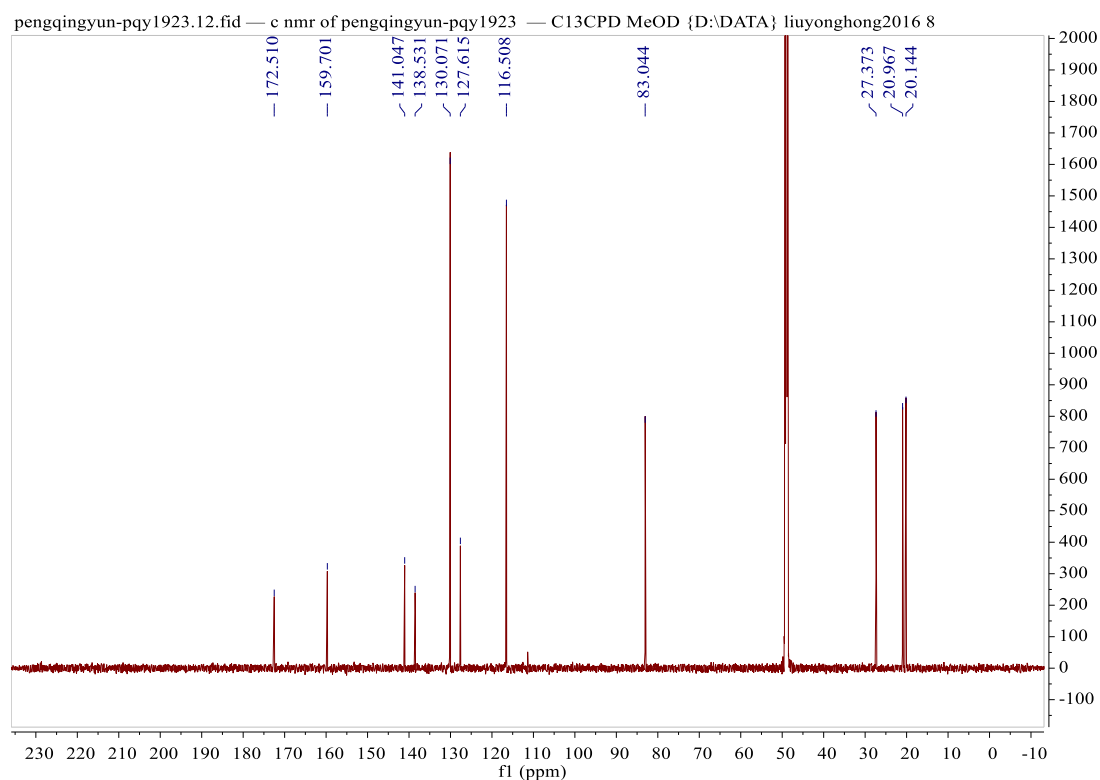

**Figure S11.**  $^{13}\text{C}$  NMR spectrum of **2** ( $\text{CD}_3\text{OD}$ , 175 MHz).

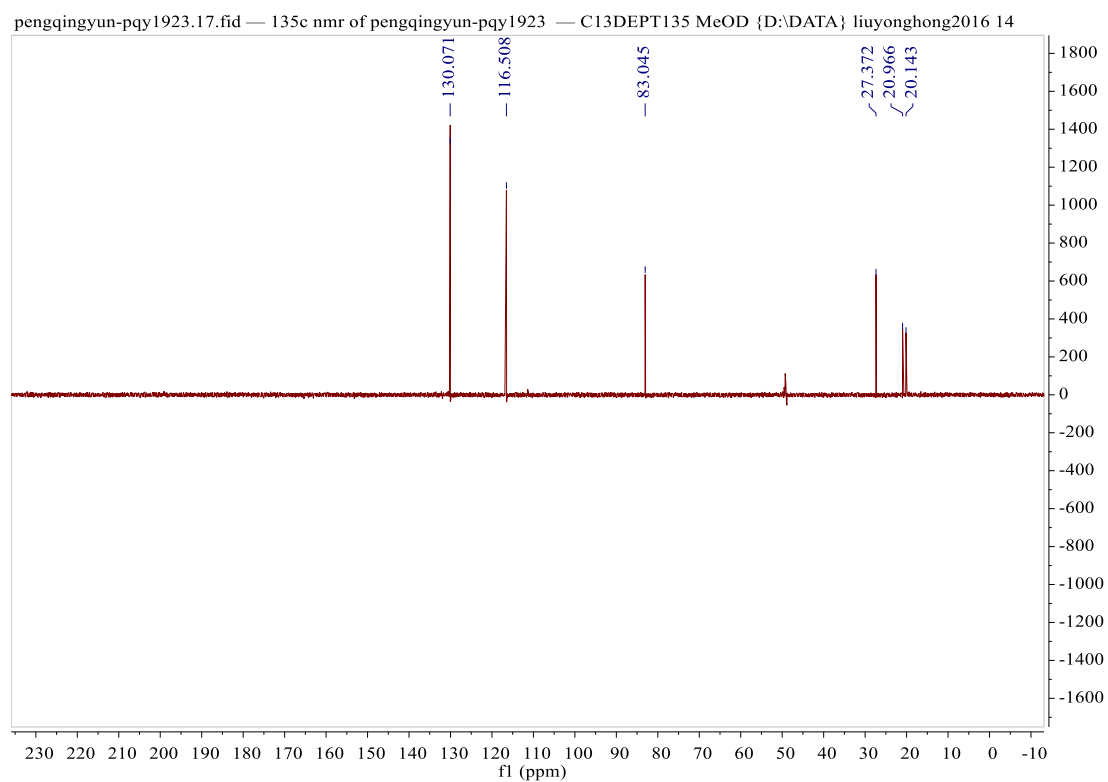

**Figure S12.** DEPT spectrum of **2** (CD<sub>3</sub>OD).

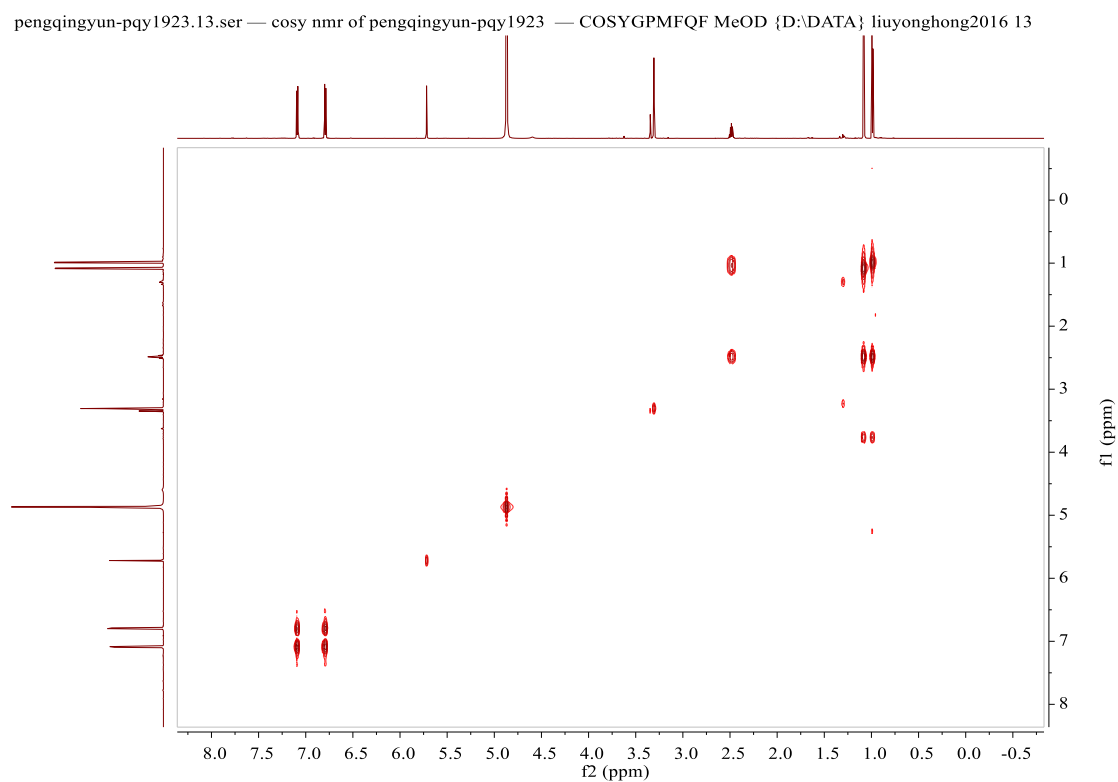

**Figure S13.** COSY spectrum of **2** (CD<sub>3</sub>OD).

pengqingyun-pqy1923.15.ser — qc nmr of pengqingyun-pqy1923 — HSQCETGP MeOD {D:\DATA} liuyonghong2016 13

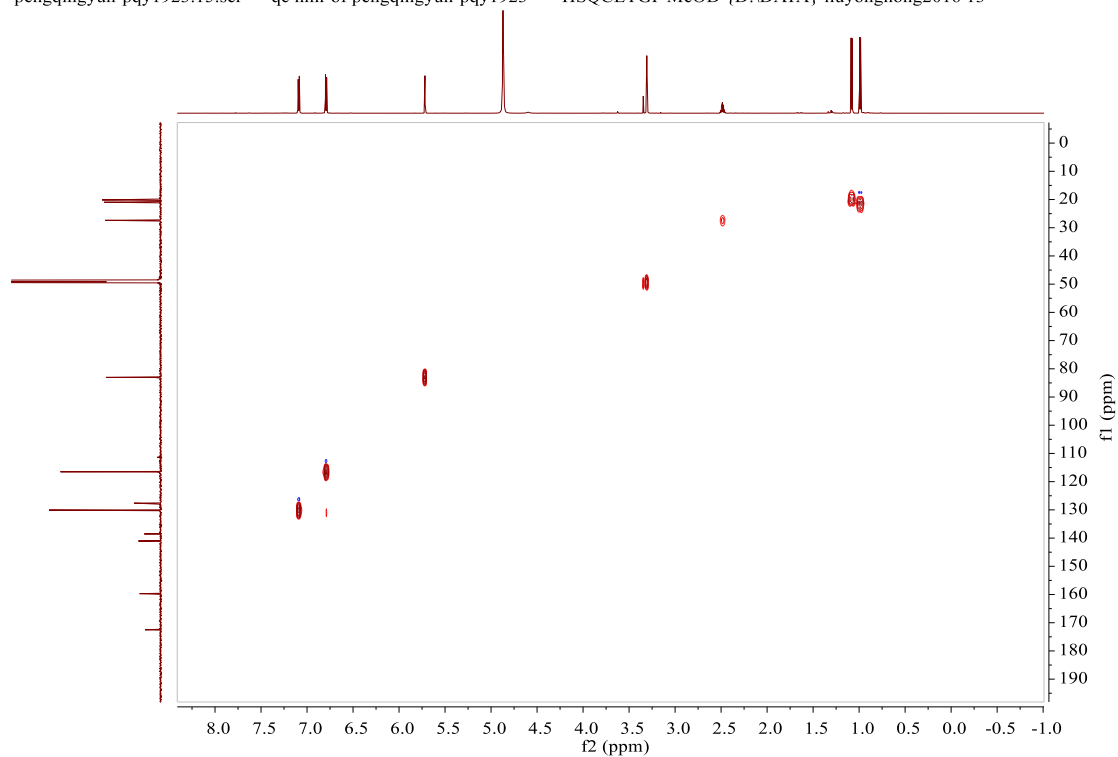

**Figure S14.** HSQC spectrum of **2** (CD<sub>3</sub>OD).

pengqingyun-pqy1923.16.ser — bc nmr of pengqingyun-pqy1923 — HMBCEGPL3ND MeOD {D:\DATA} liuyonghong2016 13

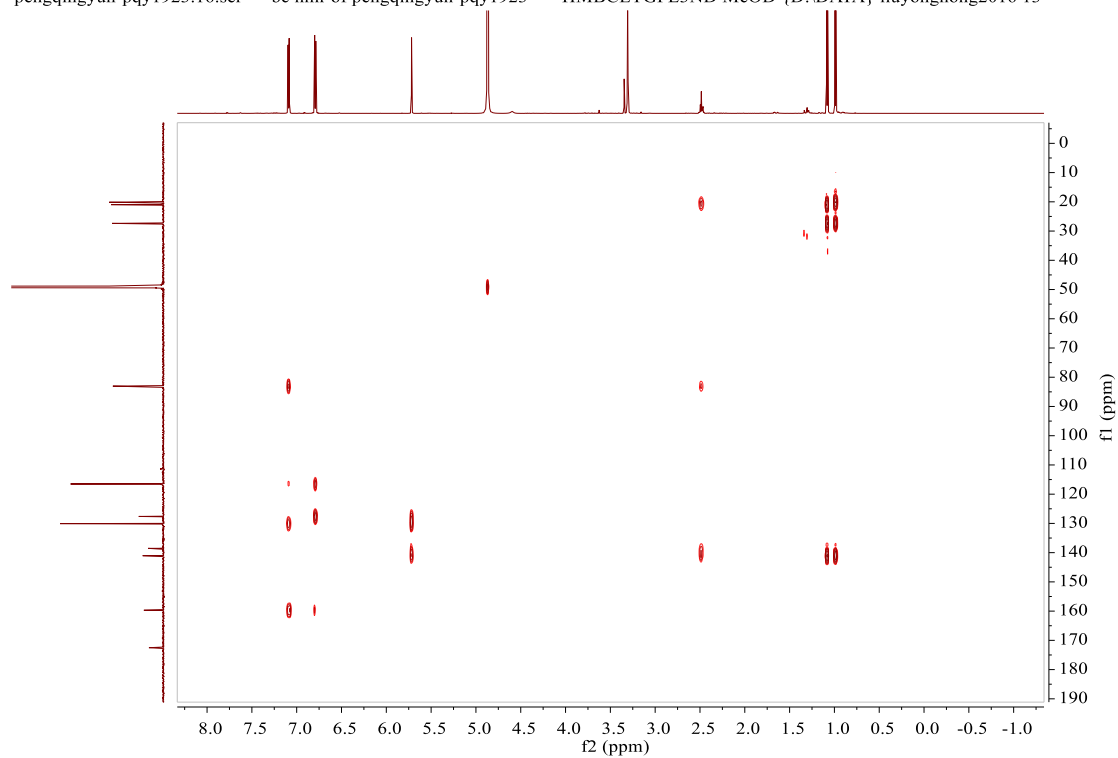

**Figure S15.** HMBC spectrum of **2** (CD<sub>3</sub>OD).

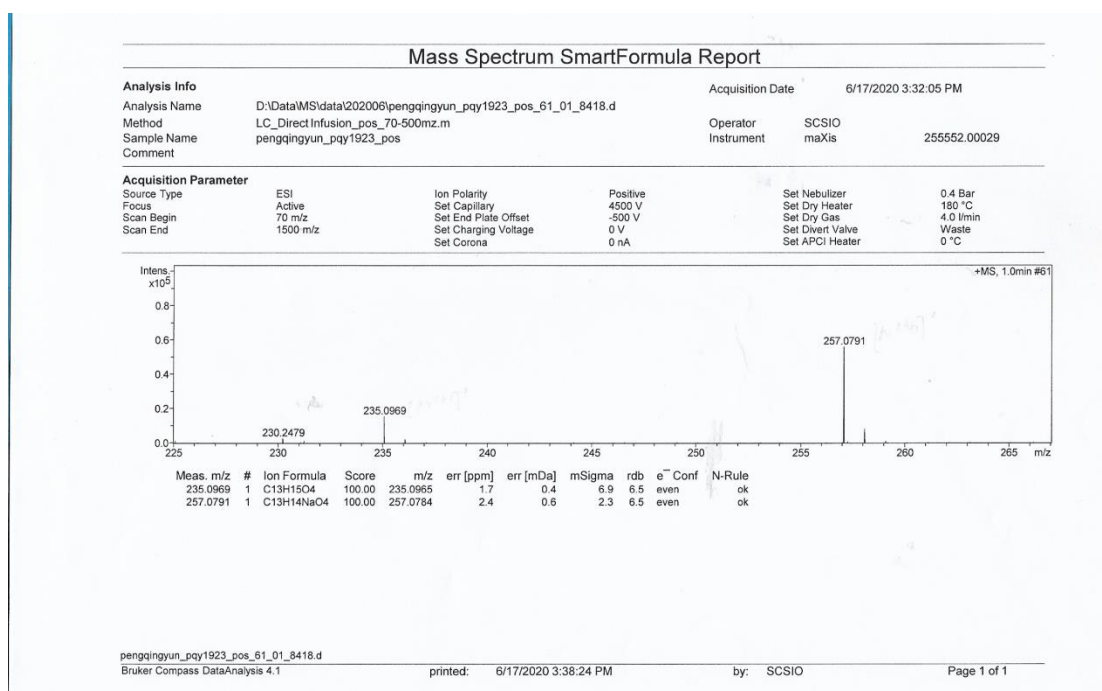

**Figure S16.** HRESIMS spectrum of **2**.

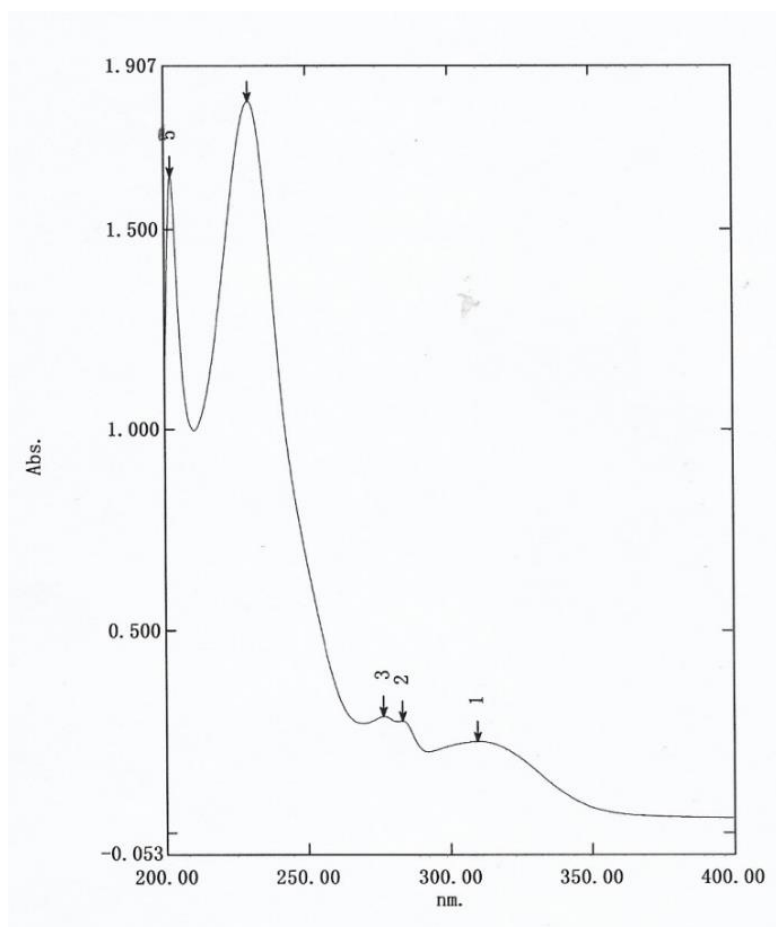

**Figure S17.** UV spectrum of **2**.



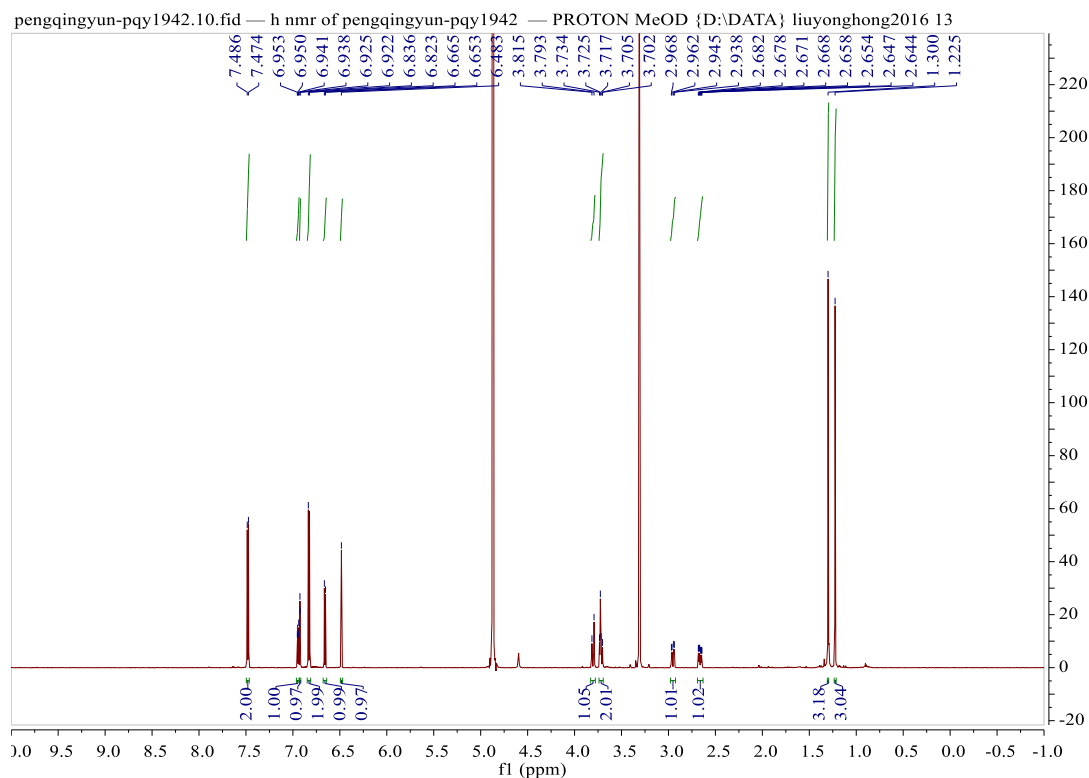

**Figure S18.**  $^1\text{H}$  NMR spectrum of **3** ( $\text{CD}_3\text{OD}$ , 700 Hz).

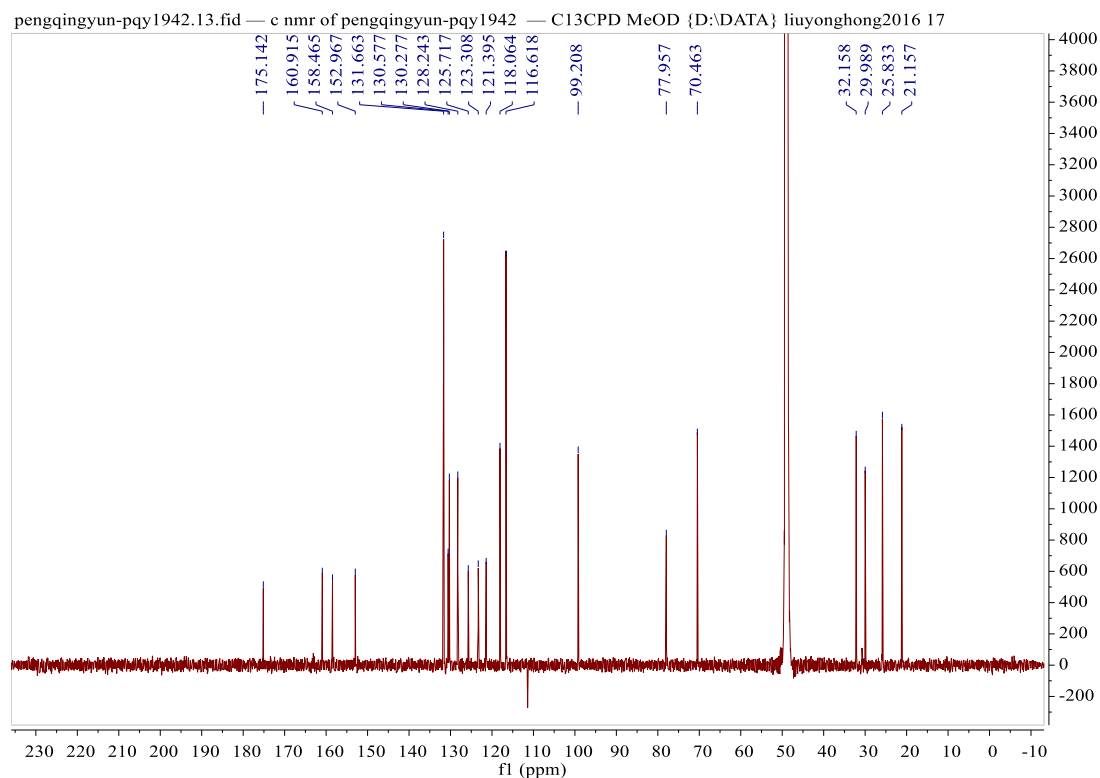

**Figure S19.**  $^{13}\text{C}$  NMR spectrum of **3** ( $\text{CD}_3\text{OD}$ , 175 Hz).

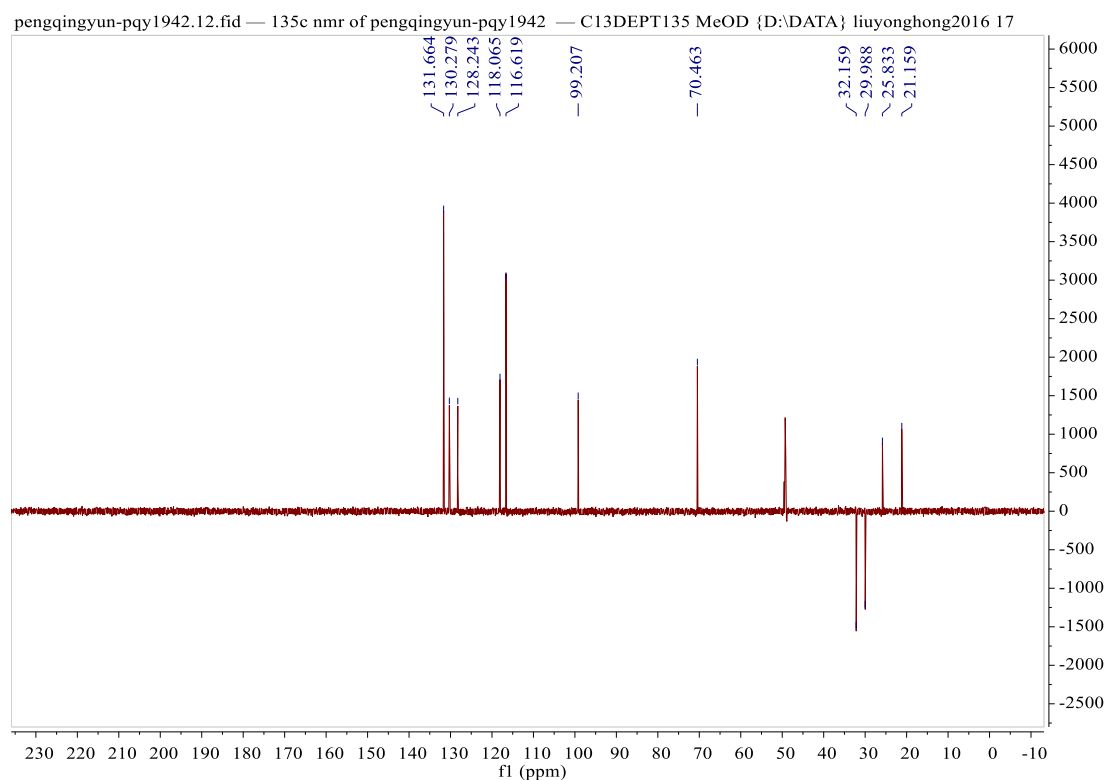

**Figure S20.** DEPT spectrum of **3** (CD<sub>3</sub>OD).

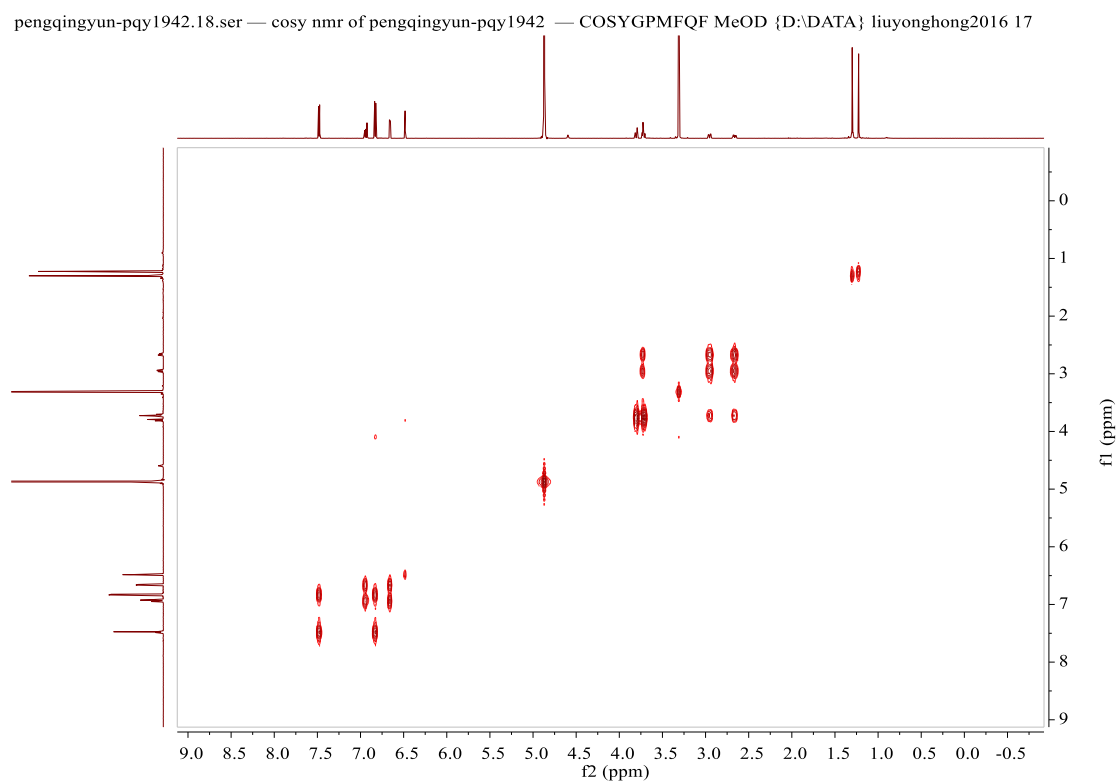

**Figure S21.** COSY of spectrum of **3** (CD<sub>3</sub>OD).

pengqingyun-pqy1942.16.ser — qc nmr of pengqingyun-pqy1942 — HSQCETGP MeOD {D:\DATA} liuyonghong2016 18

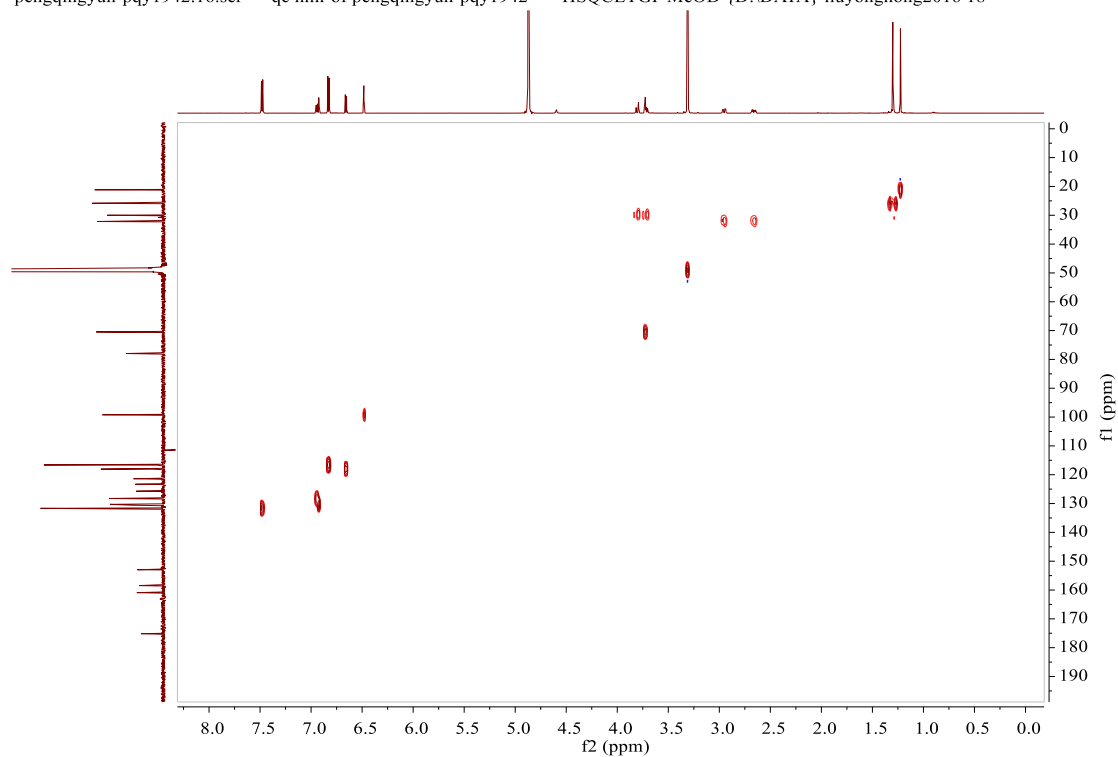

**Figure S22.** HSQC of spectrum of **3** (CD<sub>3</sub>OD).

pengqingyun-pqy1942.15.ser — bc nmr of pengqingyun-pqy1942 — HMBCEGTGPL3ND MeOD {D:\DATA} liuyonghong2016 18

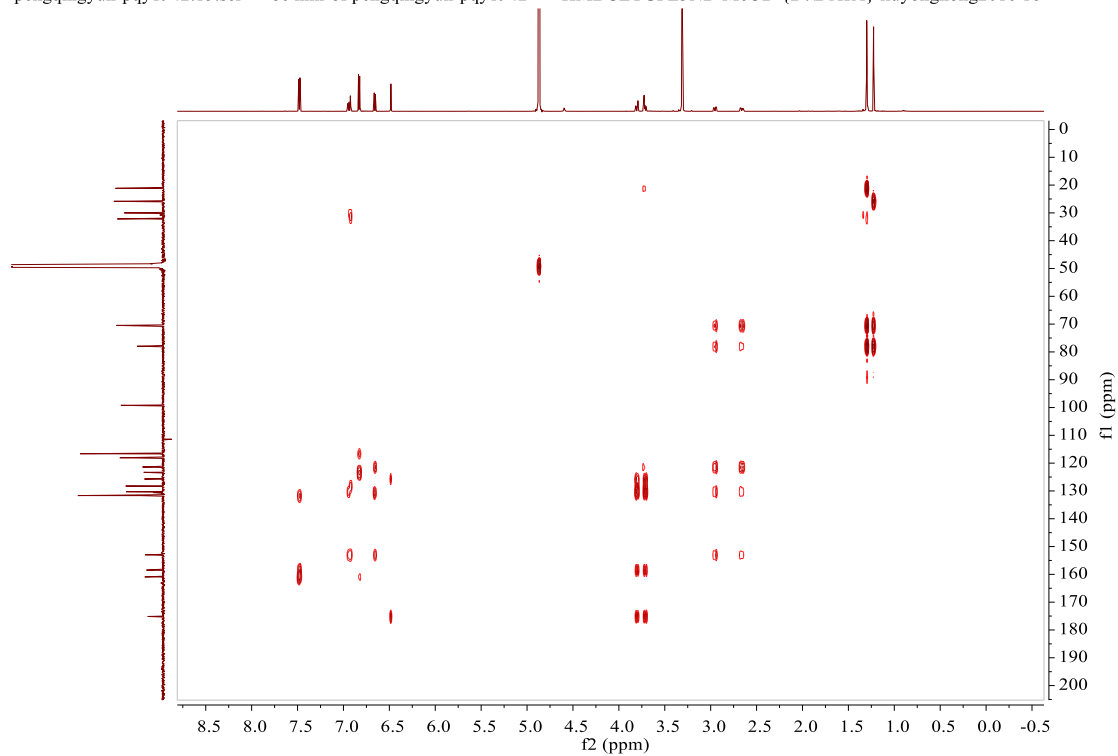

**Figure S23.** HMBC of spectrum of **3** (CD<sub>3</sub>OD).

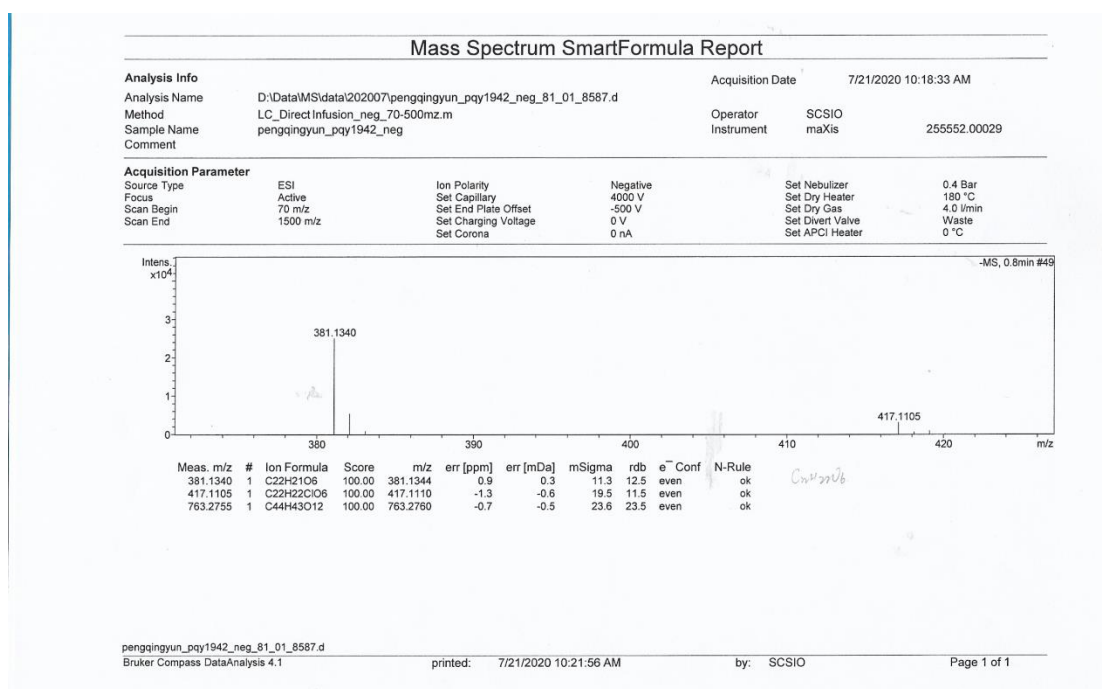

**Figure S24.** HRESIMS spectrum of **3**.

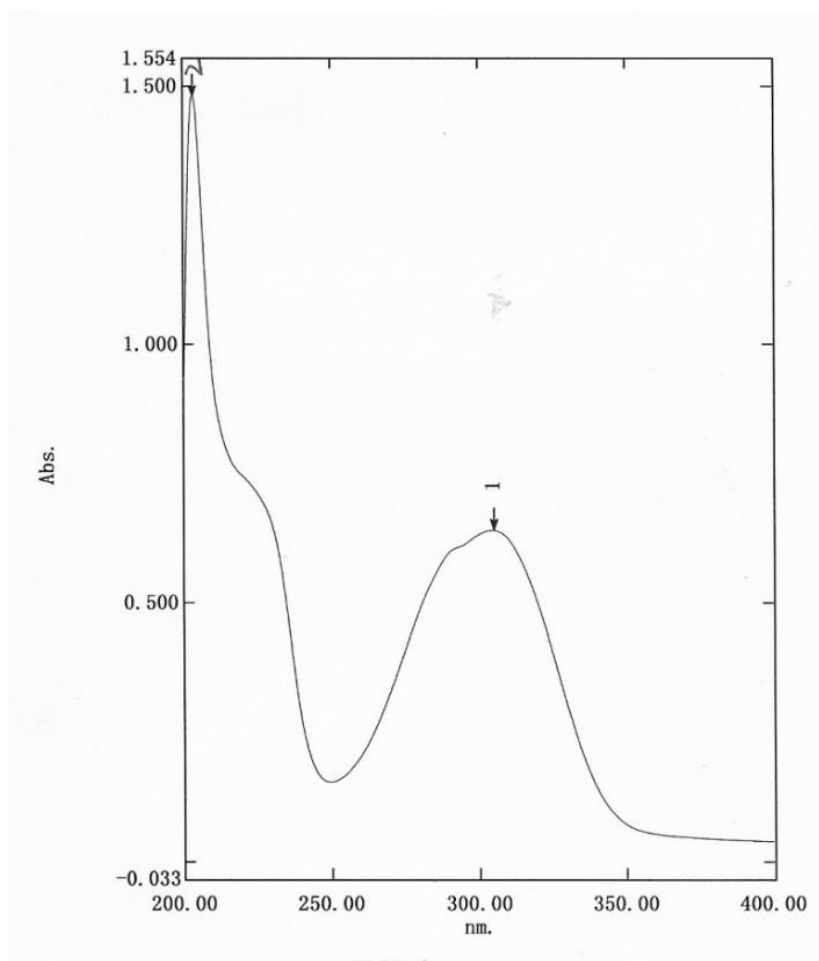

**Figure S25.** UV spectrum of **3**.

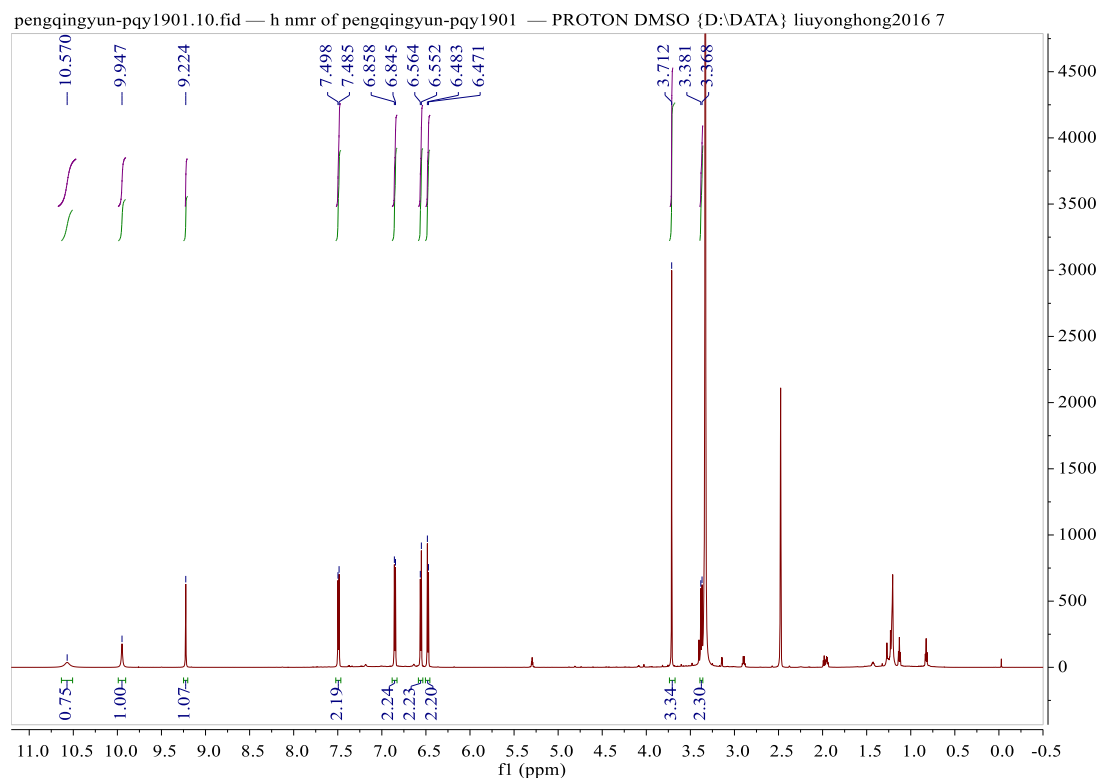

**Figure S26.**  $^1\text{H}$  NMR spectrum of **4** (DMSO- $d_6$ , 700 MHz).

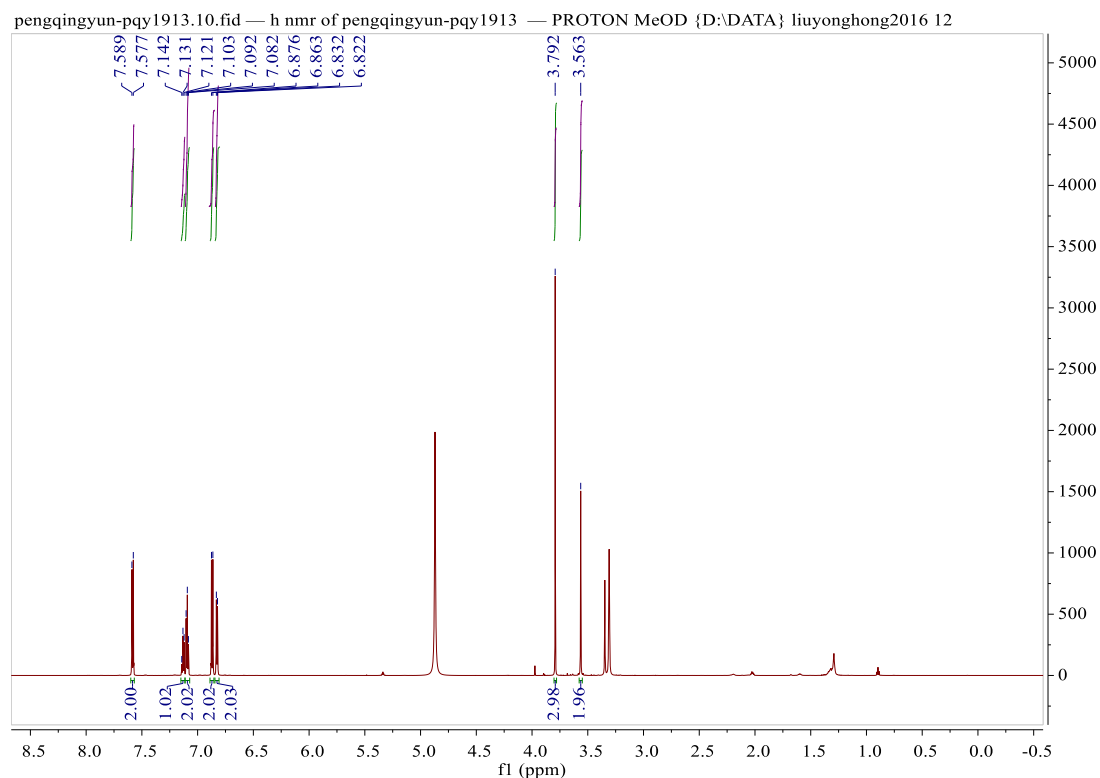

**Figure S27.**  $^1\text{H}$  NMR spectrum of **5** ( $\text{CD}_3\text{OD}$ , 700 MHz).

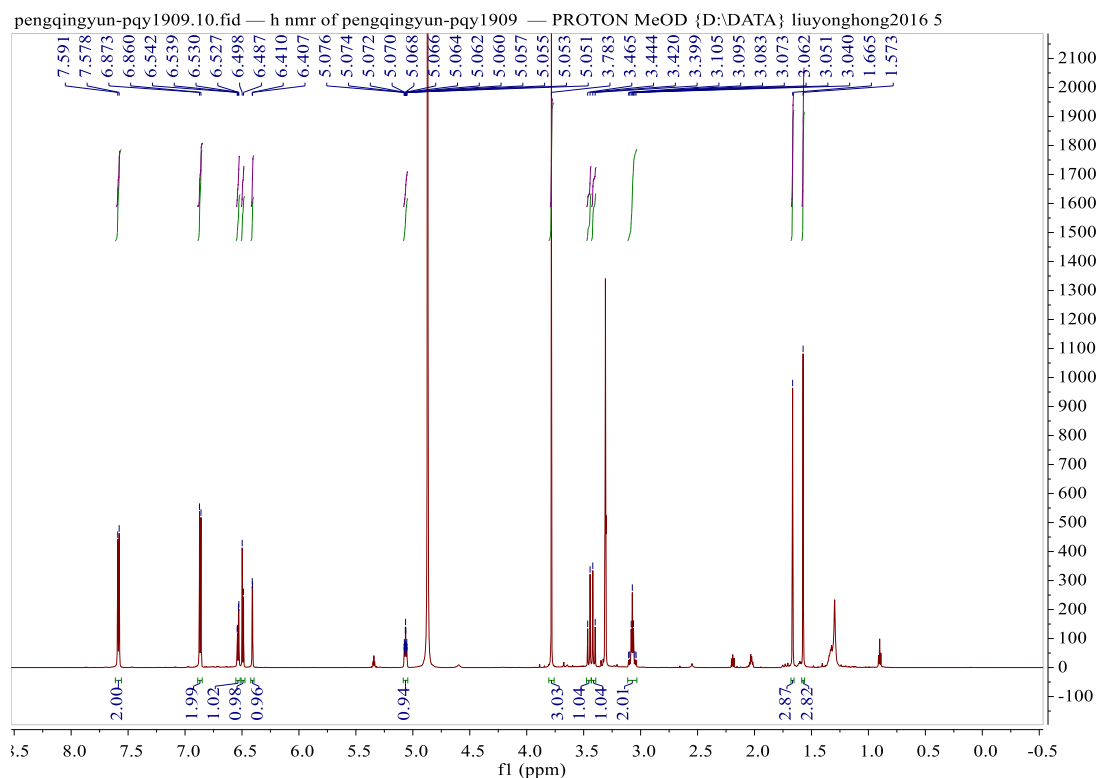

**Figure S28.**  $^1\text{H}$  NMR spectrum of **6** ( $\text{CD}_3\text{OD}$ , 700 MHz).

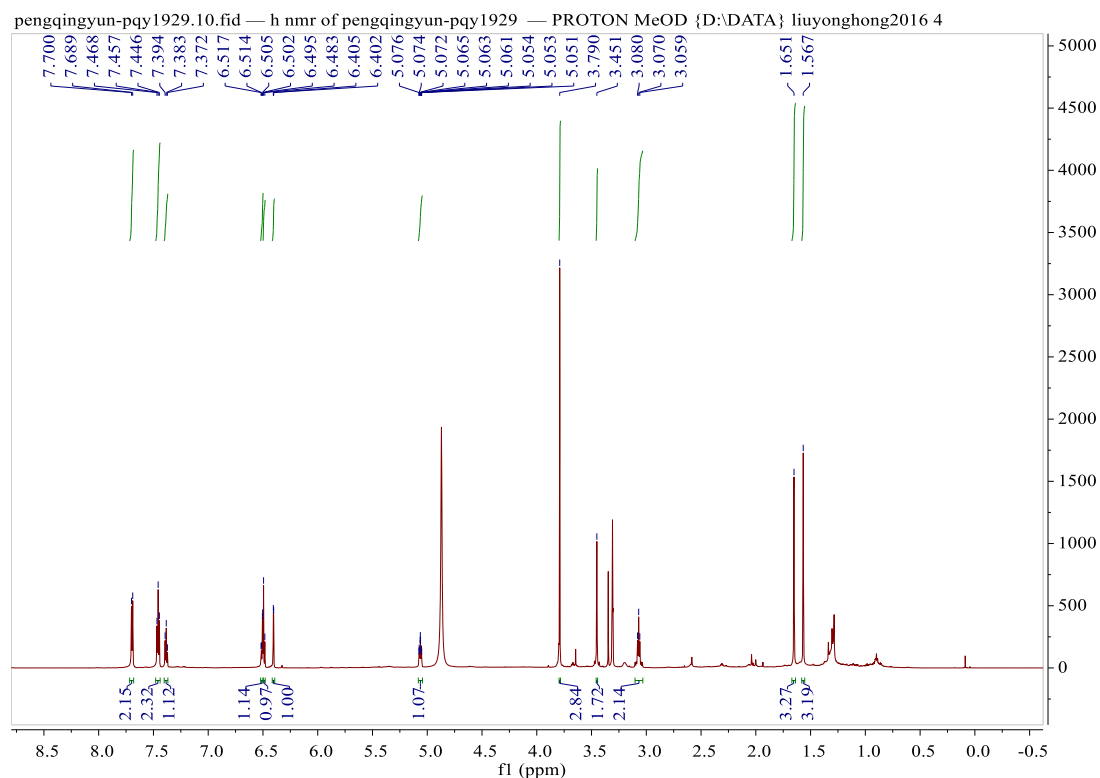

**Figure S29.**  $^1\text{H}$  NMR spectrum of **7** ( $\text{CD}_3\text{OD}$ , 700 MHz).

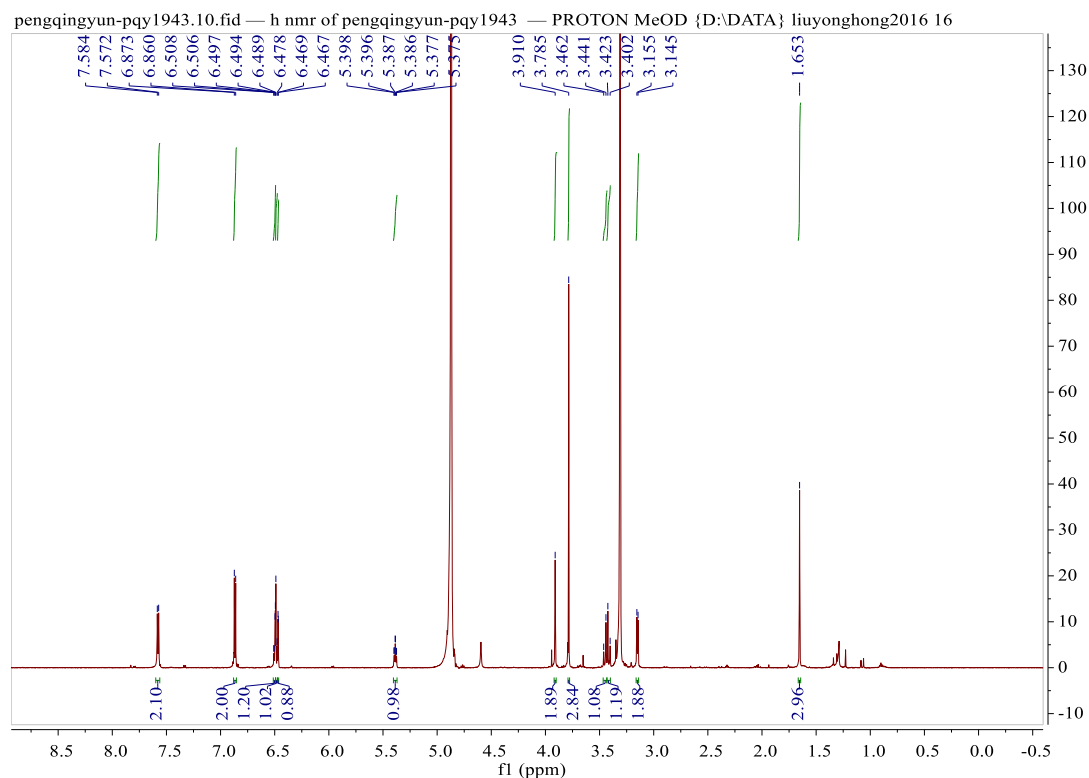

**Figure S30.**  $^1\text{H}$  NMR spectrum of **8** ( $\text{CD}_3\text{OD}$ , 700 MHz).

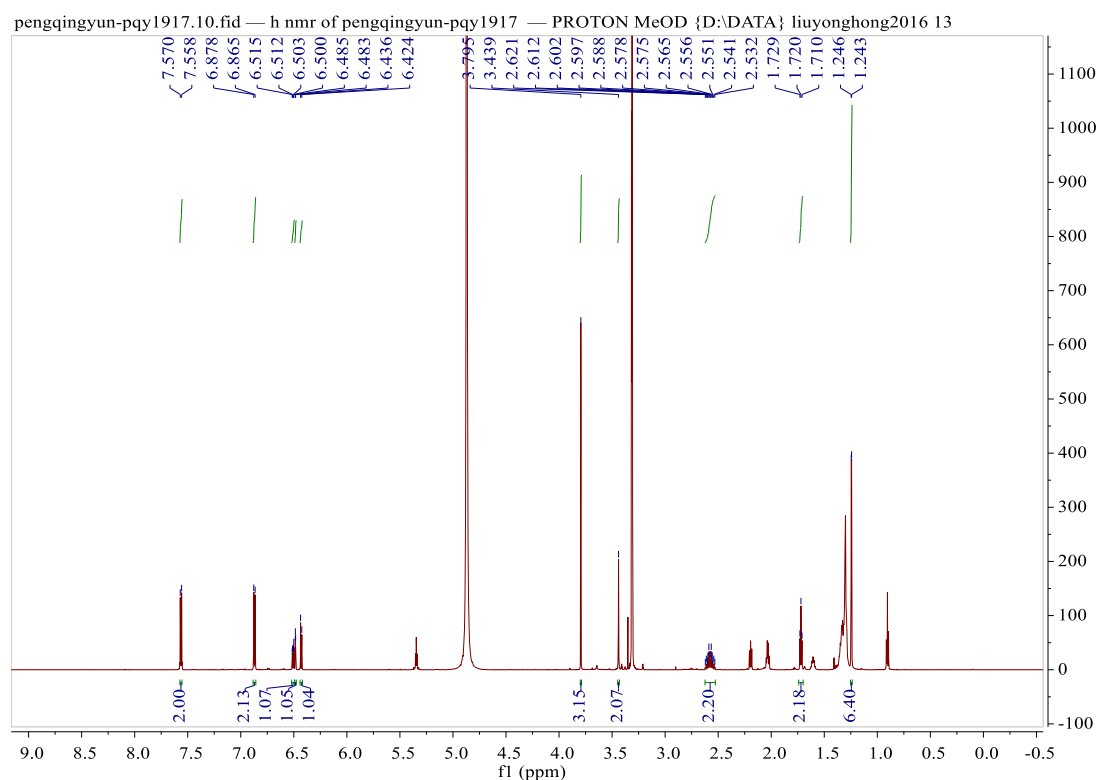

**Figure S31.**  $^1\text{H}$  NMR spectrum of **9** ( $\text{CD}_3\text{OD}$ , 700 MHz).

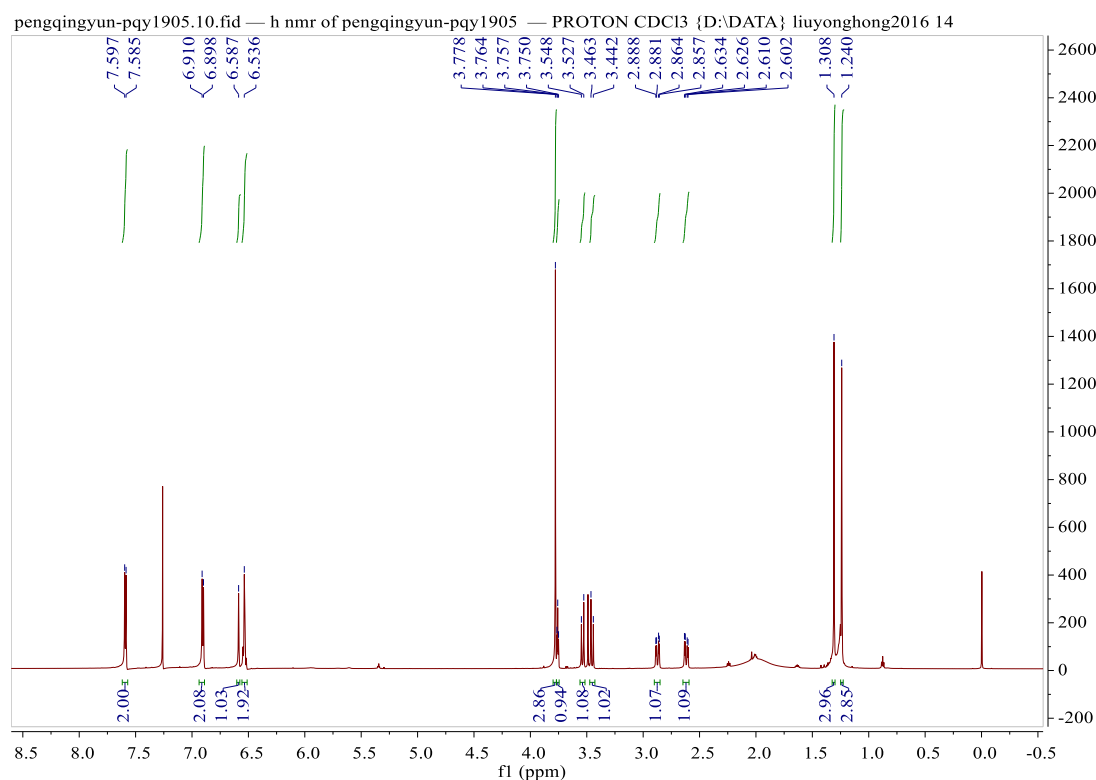

**Figure S32.**  $^1\text{H}$  NMR spectrum of **10** ( $\text{CDCl}_3$ , 700 MHz).

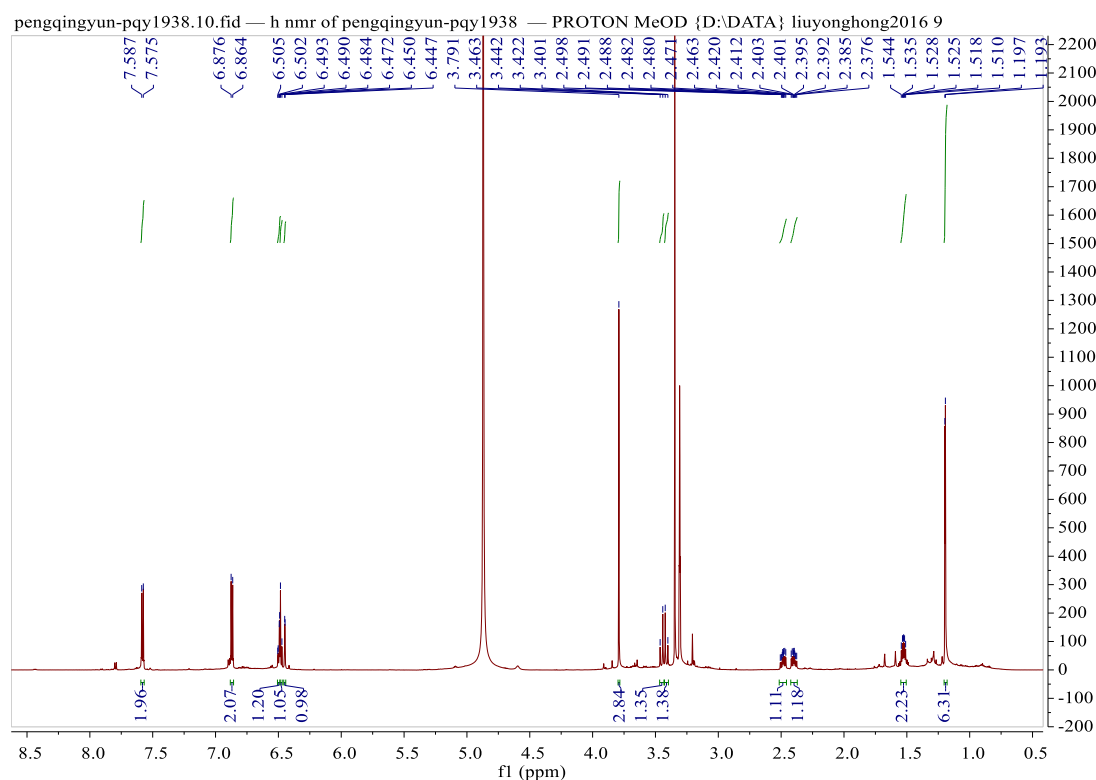

**Figure S33.**  $^1\text{H}$  NMR spectrum of **11** ( $\text{CD}_3\text{OD}$ , 700 MHz).



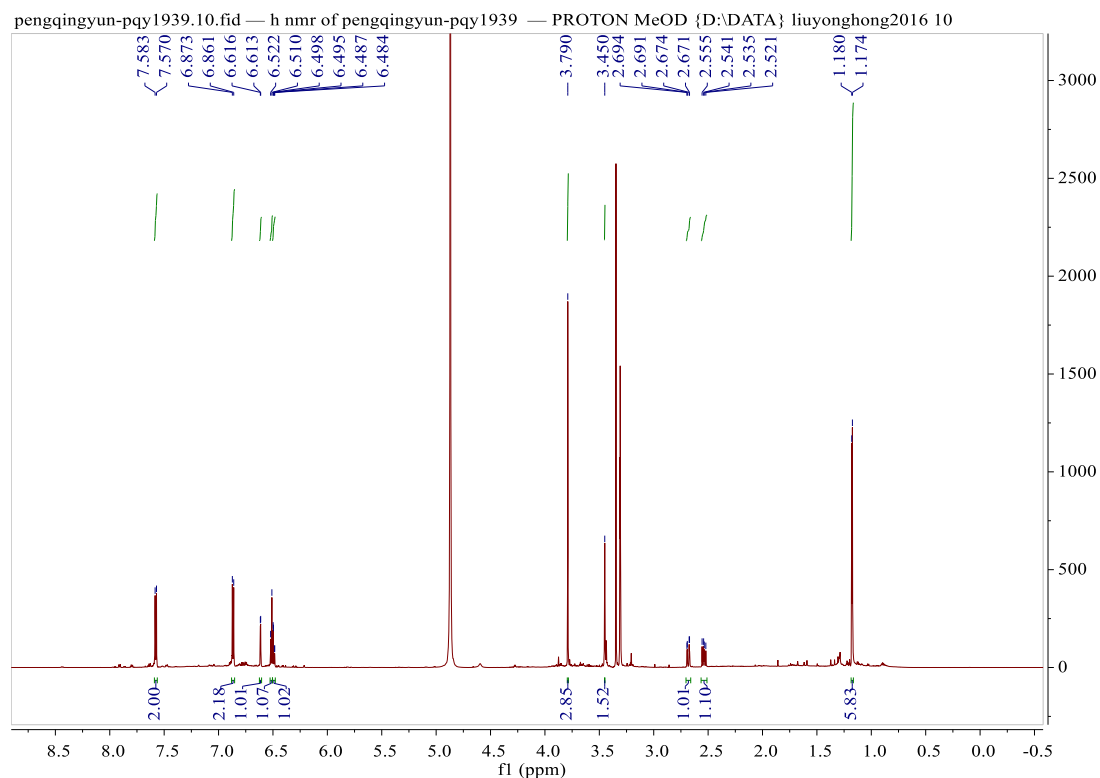

**Figure S34.**  $^1\text{H}$  NMR spectrum of **12** ( $\text{CD}_3\text{OD}$ , 700 MHz).

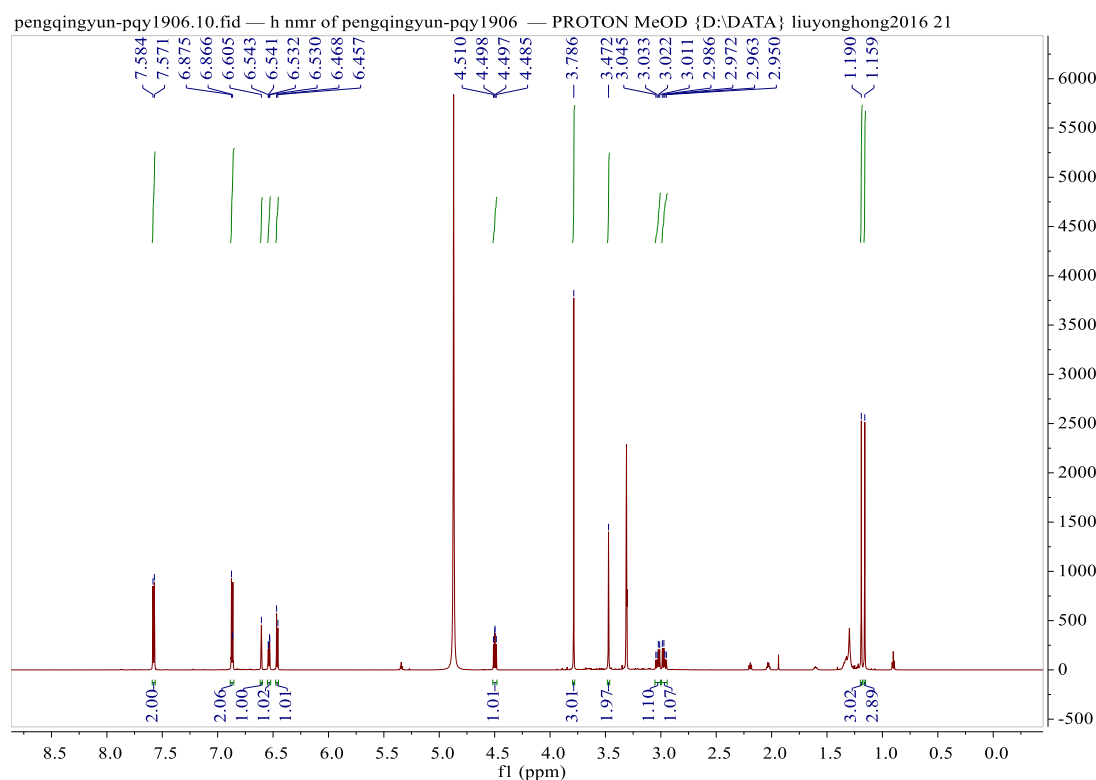

**Figure S35.**  $^1\text{H}$  NMR spectrum of **13** ( $\text{CD}_3\text{OD}$ , 700 MHz).

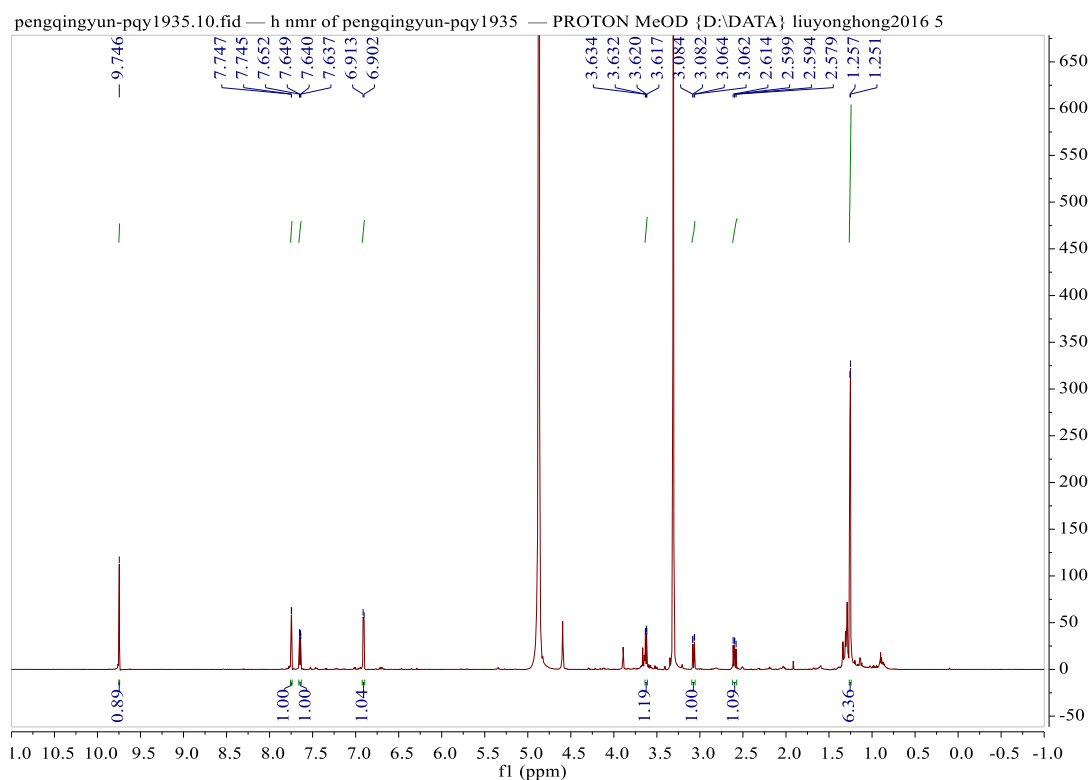

**Figure S36.**  $^1\text{H}$  NMR spectrum of **14** ( $\text{CD}_3\text{OD}$ , 700 MHz).

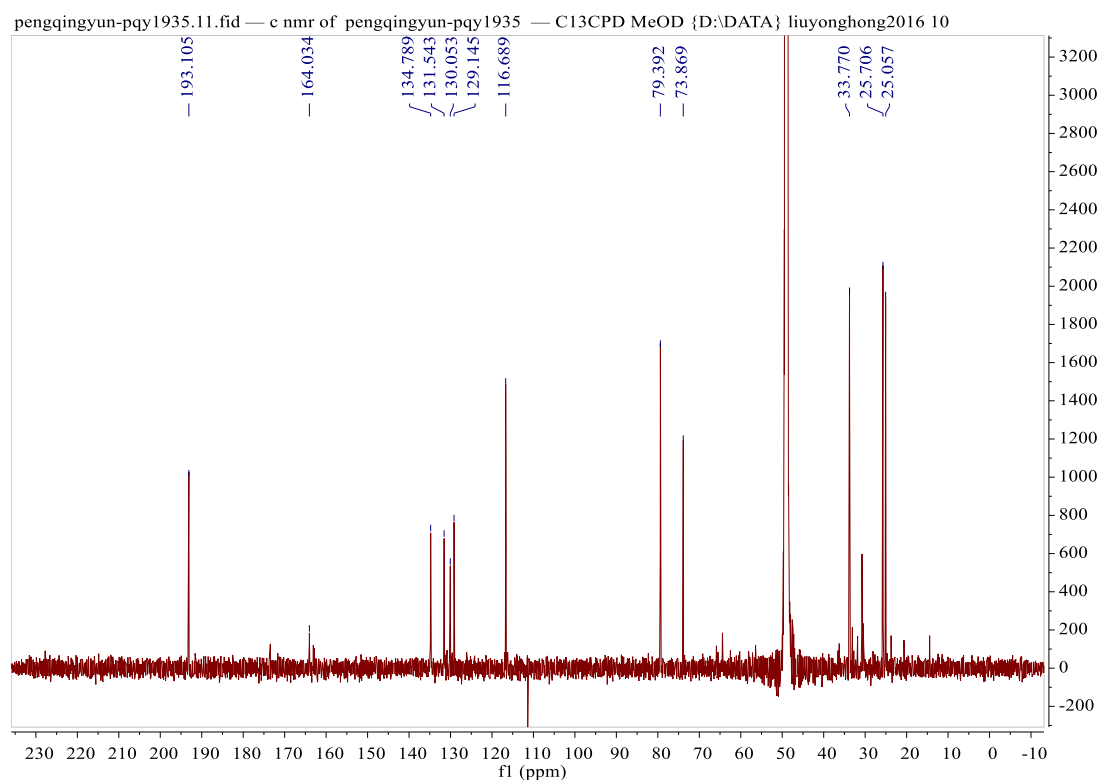

**Figure S37.**  $^{13}\text{C}$  NMR spectrum of **14** ( $\text{CD}_3\text{OD}$ , 175 MHz).

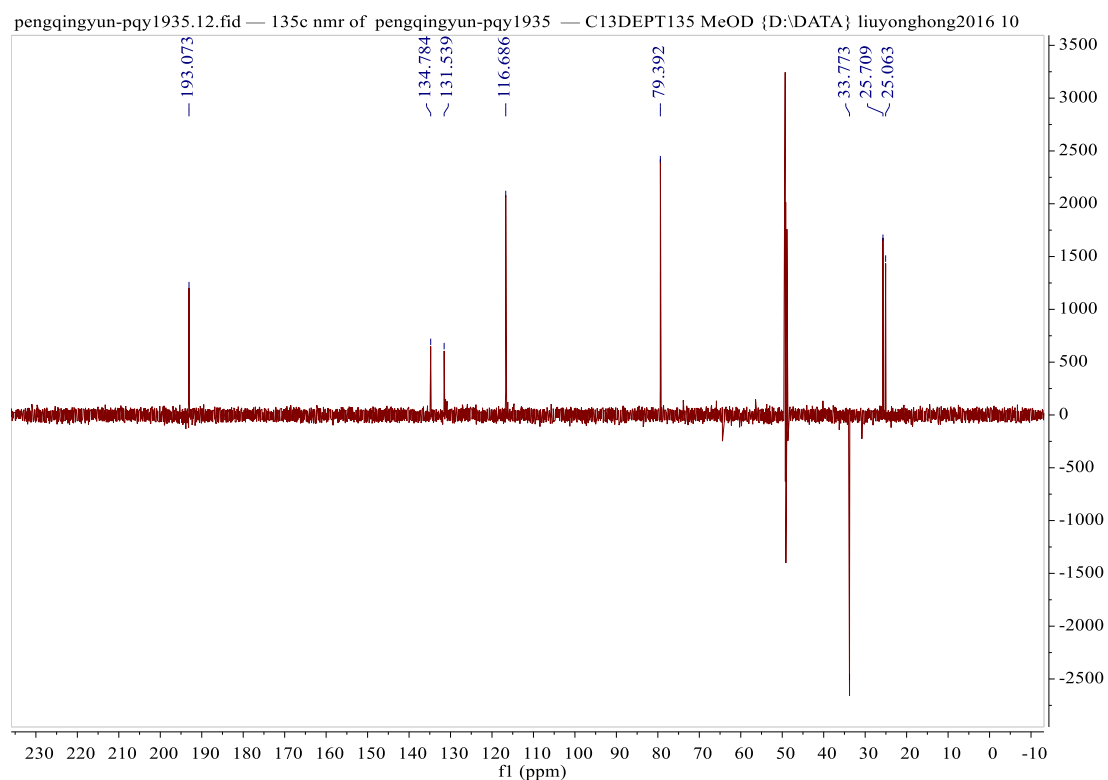

**Figure S38.** DEPT spectrum of **14** (CD<sub>3</sub>OD).

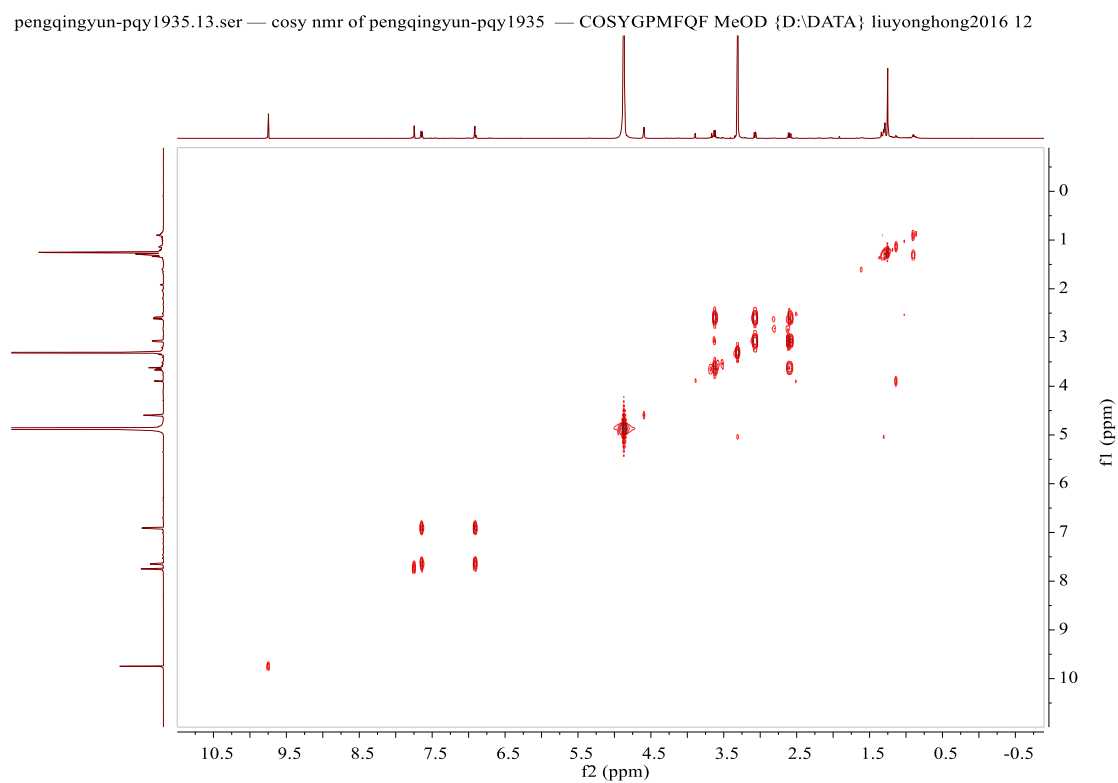

**Figure S39.** COSY spectrum of **14** (CD<sub>3</sub>OD).

pengqingyun-pqy1935.15.ser — qc nmr of pengqingyun-pqy1935 — HSQCEDETGP MeOD {D:\DATA} liuyonghong2016 12

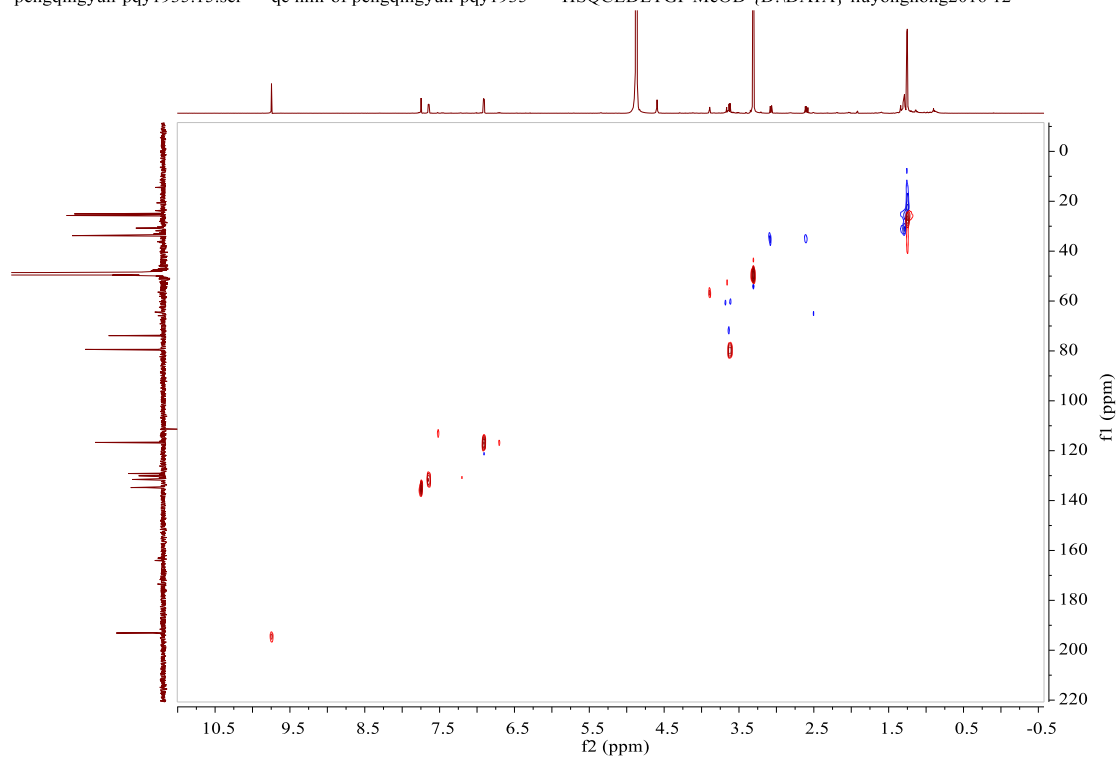

**Figure S40.** HSQC spectrum of **14** (CD<sub>3</sub>OD).

pengqingyun-pqy1935.16.ser — bc nmr of pengqingyun-pqy1935 — HMBCEGTGPL3ND MeOD {D:\DATA} liuyonghong2016 12

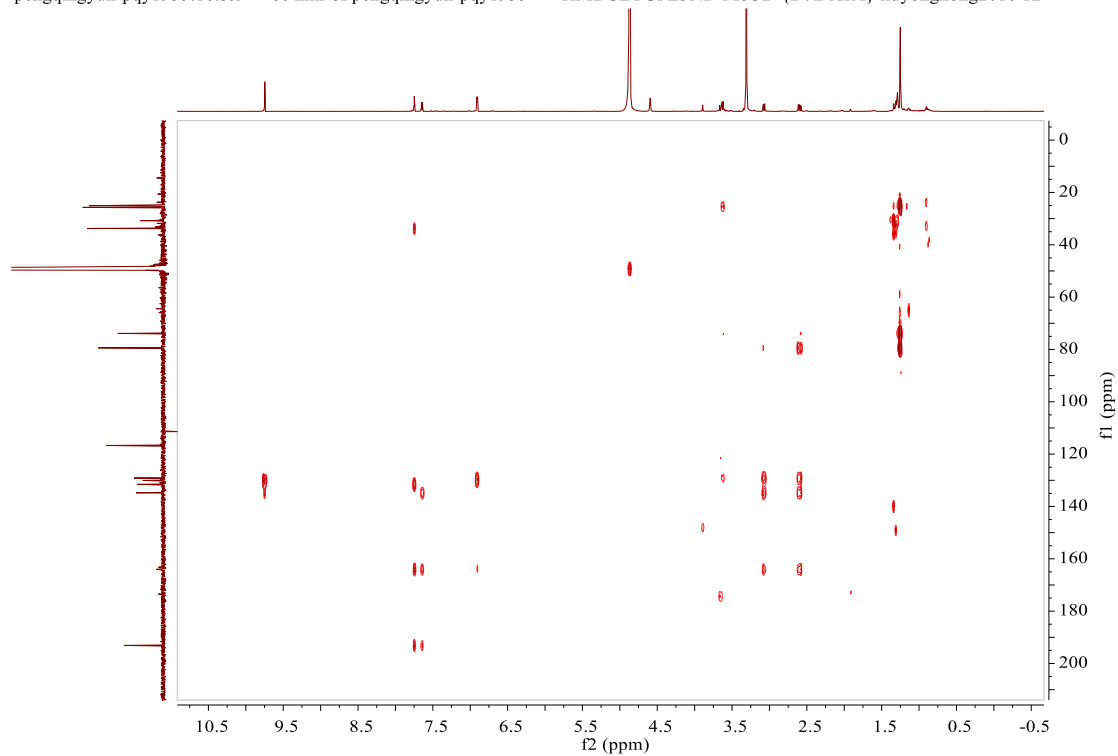

**Figure S41.** HMBC spectrum of **14** (CD<sub>3</sub>OD).

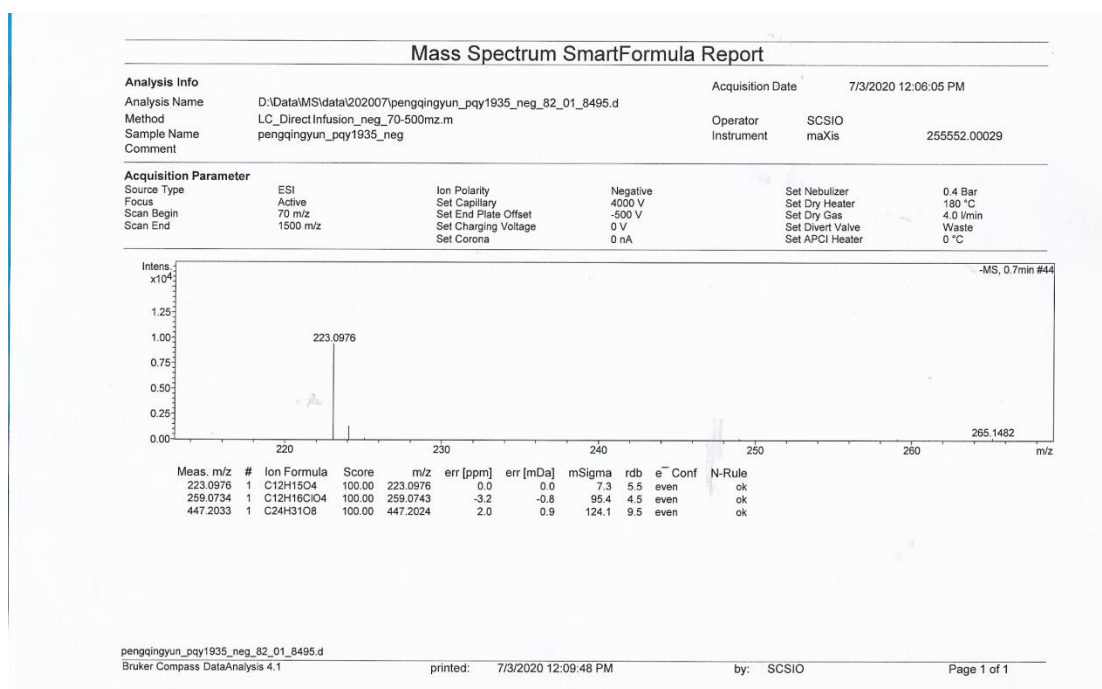

**Figure S42.** HRESIMS spectrum of **14**.

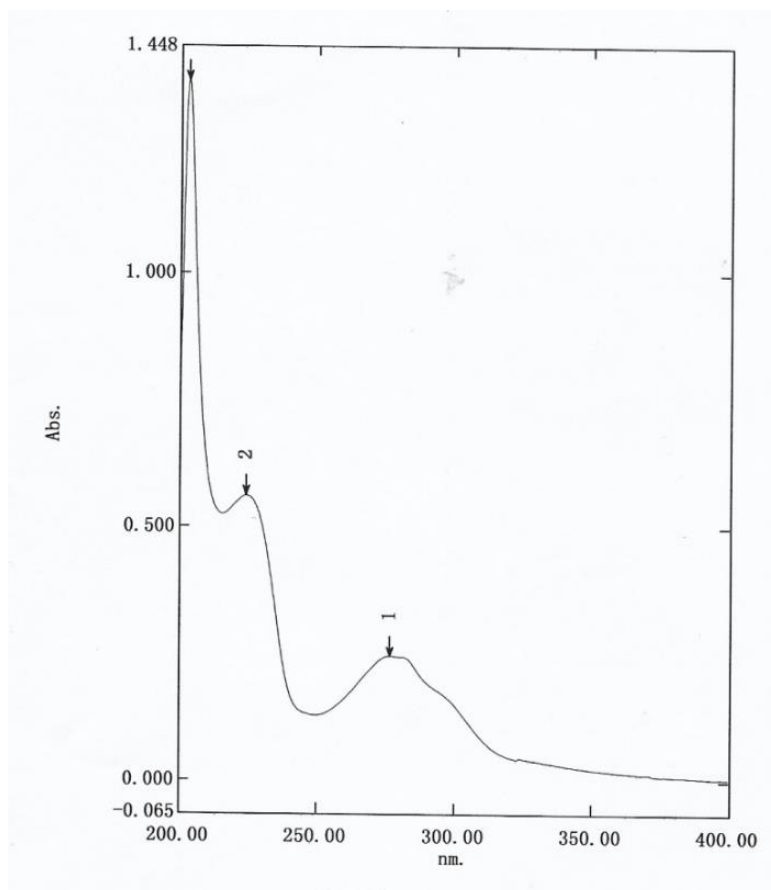

**Figure S43.** UV spectrum of **14**.
